# Supplementary material for: K2S2O8-induced site-selective phenoxazination/phenothiazination of electron-rich anilines
Source: Royal Society of Chemistry journal article supplement (doi:10.1039/d1gc03896f), 2021-12-04
Supplement: d1gc03896f1.pdf [file d1gc03896f1.pdf]

## Supporting Information

### **K<sub>2</sub>S<sub>2</sub>O<sub>8</sub>-Induced Site-selective Phenoxazination/Phenothiazination of Electron-Rich Anilines**

Zhang et al.

## Contents

|                                                                         |    |
|-------------------------------------------------------------------------|----|
| General information.....                                                | 3  |
| Reagents and materials. ....                                            | 3  |
| Characterization. ....                                                  | 3  |
| General procedure.....                                                  | 4  |
| General procedure for direct amination of triarylamine .....            | 4  |
| Procedure for gram-scale synthesis experiment .....                     | 5  |
| Procedure for Electron Paramagnetic Resonance (EPR)<br>experiment ..... | 5  |
| General Computational Calculation Details .....                         | 6  |
| Optical properties of 5a .....                                          | 8  |
| Procedure for debromination .....                                       | 10 |
| Detail descriptions for products.....                                   | 10 |

## General information

### Reagents and materials.

Unless otherwise stated, analytical grade solvents and commercially available reagents were used without further purification. Thin layer chromatography (TLC) employed glass 0.25 mm silica gel plates. Flash chromatography columns were packed with 200–300 mesh silica gel in petroleum ether (bp. 60–90 °C). Gradient flash chromatography was conducted eluting with a continuous gradient from petroleum ether to the indicated solvent, and listed as volume/volume ratio.

### Characterization.

All new compounds were characterized by  $^1\text{H}$  NMR,  $^{13}\text{C}$  NMR and HRMS. The known compounds were characterized by  $^1\text{H}$  NMR and  $^{13}\text{C}$  NMR. The  $^1\text{H}$  and  $^{13}\text{C}$  NMR spectra were recorded on a Bruker 400 MHz NMR spectrometer. All chemical shifts ( $\delta$ ) were reported in ppm and coupling constants ( $J$ ) in Hz. All chemical shifts were reported relative to tetramethylsilane (0 ppm for  $^1\text{H}$ ),  $\text{CDCl}_3$  (77.16 ppm for  $^{13}\text{C}$ ) respectively. High resolution mass spectra (HRMS) were measured with a Thermo Orbitrap Elite instrument and accurate masses were reported for the molecular ion+Hydrogen ( $\text{M}+\text{H}$ ) $^+$ . EPR spectra were recorded on a Bruker X-band A-200 spectrometer. UV-vis absorption spectra were recorded on a Shimadzu UV-2700 spectrophotometer. Photoluminescence (PL) spectra were processed on a Hitachi F-4600 fluorescence spectrophotometer.

## Experiment procedure

### General procedure:

A solution of *N,N*-Dimethylaniline (**1a**, 0.2 mmol, 24.2 mg), 10H-phenoxazine (**2a**, 0.3 mmol, 54.9 mg),  $K_2S_2O_8$  (0.4 mmol, 2 equiv., 108.1 mg), in  $CH_3CN$  (3 mL) were stirred under air at room temperature for 1 h. After completion of the reaction, the solvent was removed under reduced pressure by rotary evaporation. Then, the product was obtained by flash column chromatography on silica gel (eluent: petroleum ether/ethyl acetate = 50/1).

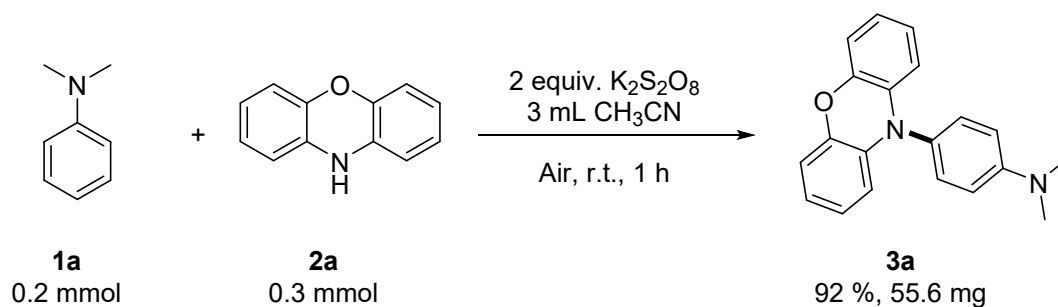

Fig. S1 General procedure synthesis experiment

### General procedure for direct amination of triarylamine:

A solution of 4,4'-dimethyltriphenylamine (**4a**, 0.2 mmol, 54.6 mg), 2-Cyano-phenothiazine (**2j**, 0.3 mmol, 67.2 mg),  $K_2S_2O_8$  (0.4 mmol, 2 equiv., 108.1 mg), in  $CH_3CN/AcOH$  (1.5 mL/1.5 mL) were stirred under air at room temperature for 24 h. After completion of the reaction, the solvent was removed under reduced pressure by rotary evaporation. Then, the product was obtained by flash column chromatography on silica gel (eluent: petroleum ether/ethyl acetate = 200/1).

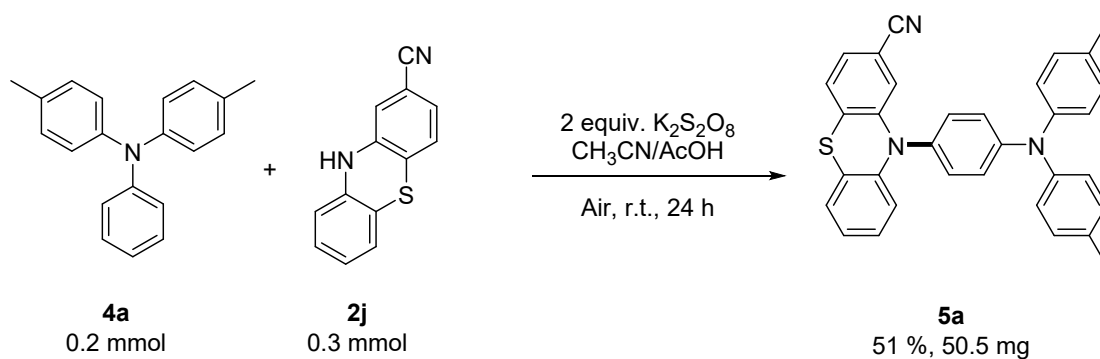

**Fig. S2.** General procedure for direct amination of triarylamine

**Procedure for gram-scale synthesis experiment:**

A solution of *N,N*-Dimethylaniline **1a** (5 mmol, 0.61 g), 10H-phenoxazine **2a** (7.5 mmol, 1.37 g), in CH<sub>3</sub>CN (50 mL) were stirred under air at room temperature. K<sub>2</sub>S<sub>2</sub>O<sub>8</sub> (10 mmol, 2 equiv., 108.1 mg) was added step-by-step in 4 hours. After continuous stirring for 2 hours, the solvent was removed under reduced pressure by rotary evaporation. Then, the product was obtained by flash column chromatography on silica gel (eluent: petroleum ether/ ethyl acetate = 50/1). It only afforded 51 % isolated yield because side reactions exist while mixing is not sufficient.

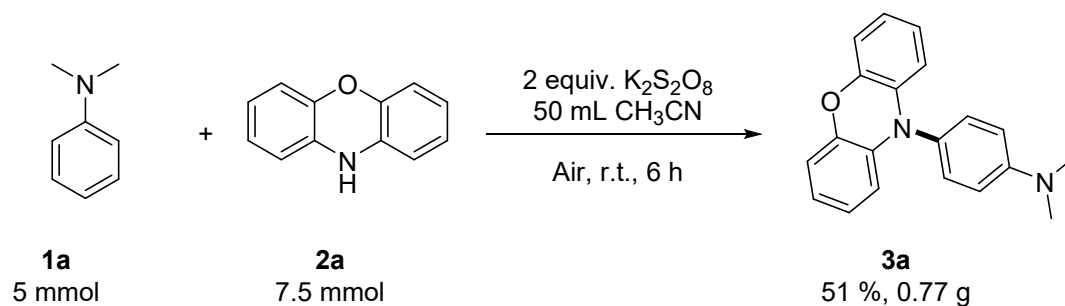

By product

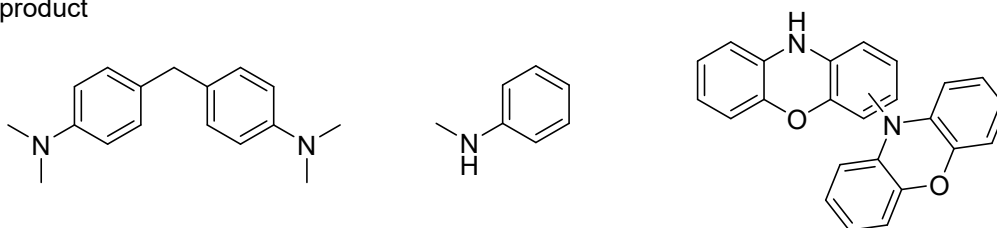

**Fig. S3.** The gram-scale synthesis experiment

Procedure for flow chemistry was different from direct increasing the amount of solvent and substrates. *N,N*-Dimethylaniline **1a** (5 mmol, 0.61 g), 10H-phenoxazine **2a** (7.5 mmol, 1.37 g) was dissolved in CH<sub>3</sub>CN (100 mL); K<sub>2</sub>S<sub>2</sub>O<sub>8</sub> (10 mmol, 2 equiv., 2.70 g) was dissolved in water (100 mL). Then, two solutions were mixed via a simple flow-chemistry reactor (**Fig S4, B or C**). The reaction finished in 1 hour, then, the solvent was removed under reduced pressure by rotary evaporation. And the product was obtained by flash column chromatography on silica gel (eluent: petroleum ether/ ethyl acetate = 50/1).

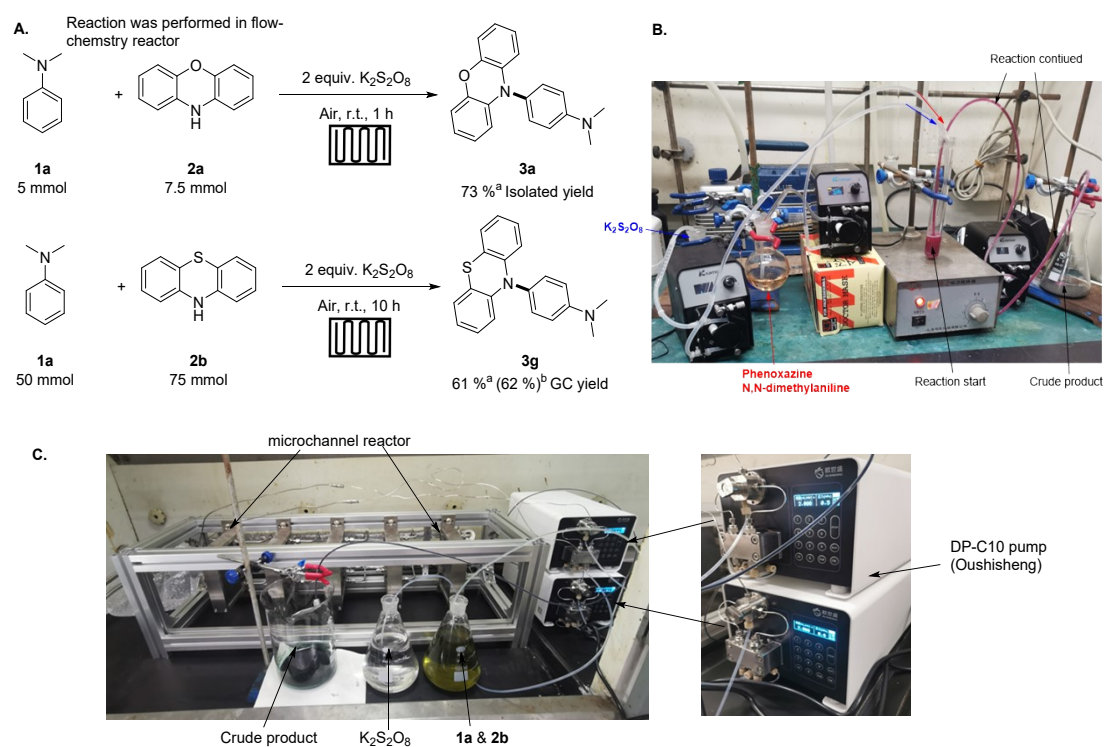

**Fig. S4.** The gram-scale synthesis experiment in flow-chemistry reactor. **(A)**: reactions was performed in flow- chemistry reactor; <sup>a</sup>: the reaction was carried in reactor B; <sup>b</sup>: the reaction was carried in reactor C; **(B)**: a simple flow reactor construct by 3 pumps and a tube; **(C)**: microchannel reactor equipped with 2 DP-C10 high pressure constant current infusion pumps.

### Procedure for Electron Paramagnetic Resonance (EPR) experiment:

A mixture of 10H-phenoxazine **2a** (0.02 mmol, 5.5 mg), and oxidant (0.02 mmol, 5.4 mg), in MeOH (3 mL) was stirred under N<sub>2</sub> at room temperature for 5 min. Then, this reaction solution was taken out by capillary and was analyzed by a Bruker X-band A-200 spectrometer at room temperature. Following spectrum was then obtained (Fig.

S4. black line,  $g = 2.0043$ ). After fitting, we proposed that this radical signal belongs to phenoxazine nitrogen radical ( $A_N = 8.0$  g,  $A_H = 3.8$  g,  $A_H = 3.8$  g,  $A_H = 3.8$  g,  $A_H = 3.8$  g). (Although  $\text{CH}_3\text{CN}$  was selected as the solvent in standard condition in this paper, it did not work well in EPR experiment, multiplets could not be observed if  $\text{CH}_3\text{CN}$  was used in EPR experiment.)

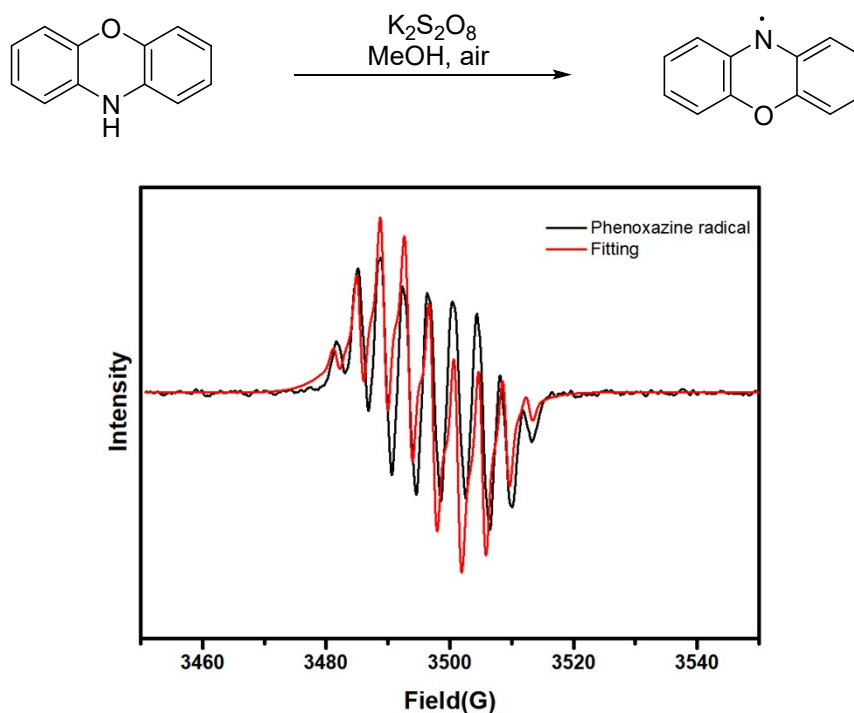

**Fig. S5.** Electron paramagnetic resonance (EPR) spectra of *N*-centered radical

### General Computational Calculation Details

DFT calculations were performed using the M06-2x method<sup>1</sup> with the Gaussian09 program<sup>2</sup>. The 6-31G(d) basis set was used for all the elements and acetonitrile was employed as the solvent during the geometry optimization. For the integration grid in the calculations, the parameter `int = ultrafine` was used. Frequency calculations at the same level of theory have been performed to identify all of the stationary points as minima (zero imaginary frequencies) or transition state (one imaginary frequencies) and to provide free energies at 298.15 K. The transition states were checked through intrinsic reaction coordinate (IRC) calculations. The solvent effects were considered

during the geometry optimization with SMD model<sup>3</sup>. For the single point energy calculations, 6-311+G(d,p) basis set was used for all the elements. Grimme's dispersion correction<sup>4</sup> was used during the calculations.

The activation free energies of single electron transfer reactions (1) & (2) were calculated using the Savéant's model<sup>5, 6</sup> and the outer sphere Marcus-Hush model<sup>7-9</sup>, respectively.

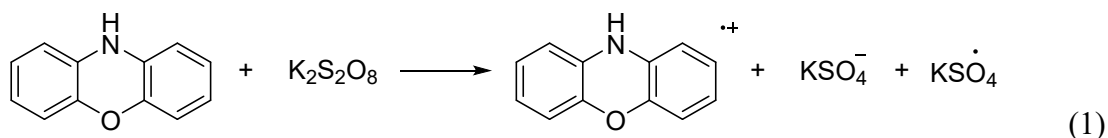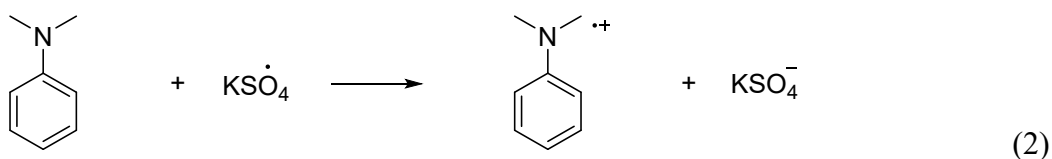

$$\Delta G_{\text{OSET}}^\ddagger = \Delta G_0^\ddagger \left(1 + \frac{\Delta_r G}{4\Delta G_0^\ddagger}\right)^2 \quad (3)$$

The activation free energy of single electron transfer reaction can be calculated using the above equation (3), in which  $\Delta_r G$  is the Gibbs free energy of the reaction,  $\Delta G_0^\ddagger$  is the intrinsic barrier for the outer sphere electron transfer.

For reaction (2), the  $\Delta G_0^\ddagger$  can be calculated by the following equation.

$$\Delta G_0^\ddagger = \frac{\lambda_0 + \lambda_i}{4} \approx \frac{\lambda_0}{4}$$

$\lambda_i$  is the inner reorganization energy, which is usually expected to be small enough to be neglected.  $\lambda_0$  is the solvent reorganization energy and can be calculated by the following equation.

$$\lambda_0 = (332\text{kcal}\cdot\text{mol}^{-1}) \left(\frac{1}{2r_1} + \frac{1}{2r_2} - \frac{1}{r_1 + r_2}\right) \left(\frac{1}{\varepsilon_{\text{op}}} - \frac{1}{\varepsilon}\right)$$

$r_1$  and  $r_2$  are the radii of the molecules involved in electron transfer,  $\varepsilon_{\text{op}}$  is the optical dielectric constant (1.807 in this case),  $\varepsilon$  is the static dielectric constant for the acetonitrile solvent (35.688 in this case). Radii of the molecule can be estimated by assuming the molecule to be a perfect sphere, i.e.  $r = \left(\frac{3V}{4\pi}\right)^{1/3}$ . The volume of the molecule can be calculated using the "volume" keyword in Gaussian 09.



For reaction (1), the single electron transfer and the cleavage of  $K_2S_2O_8$  are concerted.

$$\Delta G_0^\ddagger = \frac{\lambda_0 + \lambda_i + \text{BDFE}}{4} \approx \frac{\lambda_0 + \text{BDFE}}{4}$$

BDFE is the bond dissociation free energy of  $K_2S_2O_8$ .

The activation free energy of reaction (1) and (2) are estimated to be  $18.8 \text{ kcal}\cdot\text{mol}^{-1}$  and  $0.5 \text{ kcal}\cdot\text{mol}^{-1}$ , respectively.

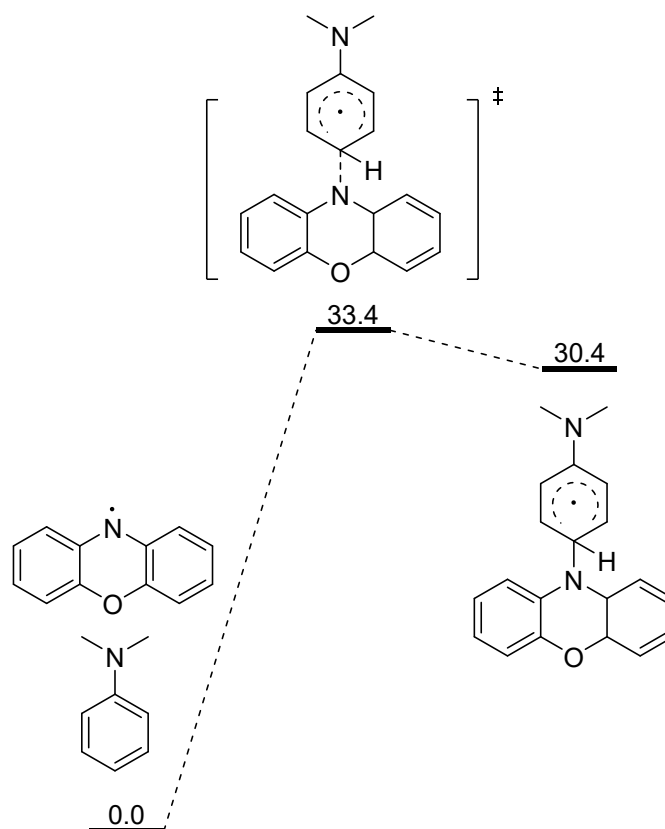

For the radical addition pathway as shown above, the free energy barrier was calculated to be  $33.4 \text{ kcal}\cdot\text{mol}^{-1}$ , which meant that it was unrealizable under the room temperature.

### Optical properties of **5a** :

To test the optical properties of **5a**, **5a** was dissolved in solvent first, then diluted to  $10^{-5} \text{ M}$ . UV-vis absorption spectra were recorded on a Shimadzu UV-2700 spectrophotometer. UV-vis absorption spectra (Fig. S5.) showed that **5a** not only could adsorb the ultraviolet light, but also have a weak adsorption in visible light region (390-760 nm). Photoluminescence (PL) spectra were processed on a Hitachi F-4600 fluorescence spectrophotometer. PL spectra showed that **5a** could be excited by

either ultraviolet light ( $\lambda_{\text{exc}} = 300 \text{ nm}$ , Fig. S6. red line) or visible light ( $\lambda_{\text{exc}} = 450 \text{ nm}$ , blue light, Fig. S6. black line).

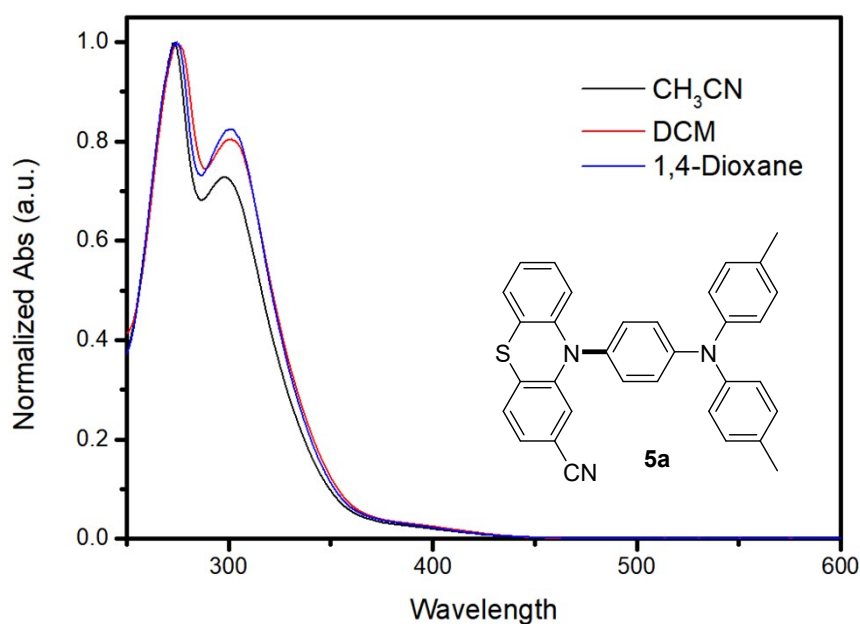

**Fig. S6** UV-Vis adsorption spectra of **5a**,  $10^{-5} \text{ M}$  **5a** solution in CH<sub>3</sub>CN, DCM, 1,4-Dioxane were test

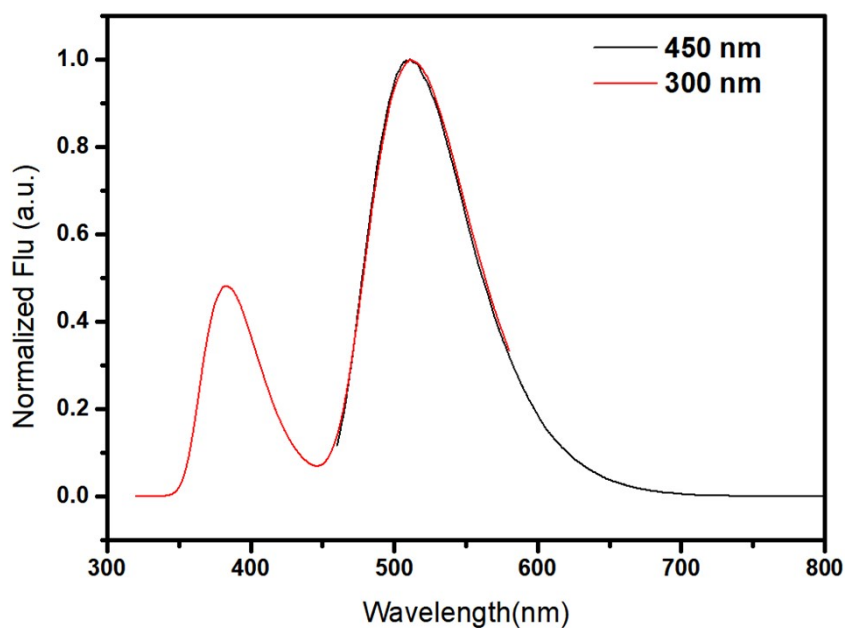

**Fig. S7** Fluorescence of spectra of **5a**,  $10^{-5} \text{ M}$  **5a** was excited by 300 nm (red line) or 450 nm (black line) light in CH<sub>3</sub>CN

#### Procedure for debromination:

A schlenk tube equipped with a stir bar was loaded with 6-Bromonicotinic acid ethyl

ester (0.2 mmol, 43.2 mg), photo-catalyst **5b** (0.01 mmol, 5.0 mg), Tri-*n*-butylamine (1 mmol, 185.4 mg) and CH<sub>3</sub>CN (3 mL) under N<sub>2</sub> atmosphere. The solution was then stirred at room temperature under the irradiation of 12W blue LED lamp for 24 h. After the completion of reaction, biphenyl (15.4 mg, 0.1 mmol) was added as an internal standard, and the reaction yield was monitored by GC.

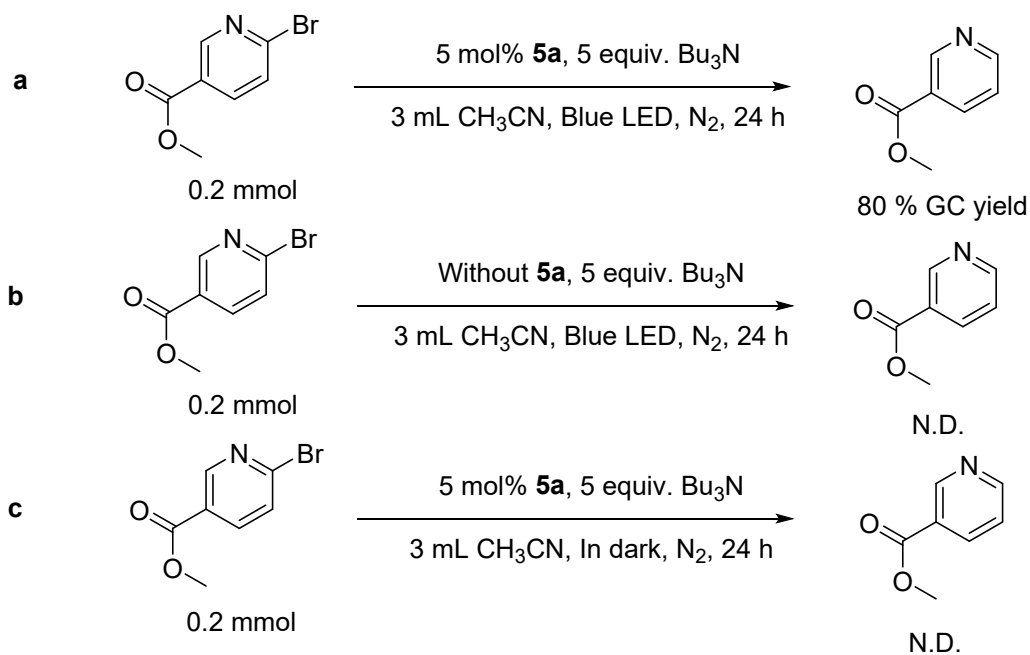

**Fig. 8.** Control experiments.

### Detail descriptions for products

3a, 3g, 3h, 3i, 3j& 3k has been reported in our previous work<sup>10</sup>, so that only NMR spectra was provided. Both NMR spectra and high resolution mass data were provided for other compounds.

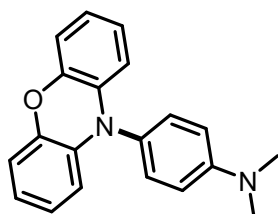

***N,N*-Dimethyl-4-(10H-phenoxazin-10-yl)aniline (3a):** white solid was obtained in 92% isolated yield. <sup>1</sup>H NMR (400 MHz, Chloroform-*d*) δ 7.14 (d, *J* = 8.9 Hz, 2H), 6.85 (d, *J* = 8.9 Hz, 2H), 6.66 – 6.54 (m, 6H), 6.00 – 5.94 (m, 2H), 3.02 (s, 6H). <sup>13</sup>C NMR (101 MHz, CDCl<sub>3</sub>) δ 150.22, 144.14,

135.30, 131.21, 127.10, 123.31, 120.90, 115.25, 114.13, 113.38, 40.67.

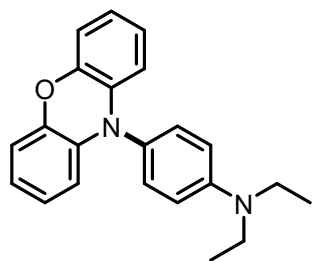

***N,N*-diethyl-4-(10H-phenoxazin-10-yl)aniline(3b)**: white solid was obtained in 93% isolated yield. <sup>1</sup>H NMR (400 MHz, Chloroform-*d*) δ 7.09 (d, *J* = 9.0 Hz, 2H), 6.79 (d, *J* = 9.0 Hz, 2H), 6.67 – 6.55 (m, 6H), 6.05 – 5.96 (m, 2H), 3.40 (q, *J* = 7.1 Hz, 4H), 1.22 (t, *J* = 7.1 Hz, 6H). <sup>13</sup>C NMR (101 MHz, CDCl<sub>3</sub>) δ 147.56, 144.14, 135.37, 131.32, 125.86, 123.29, 120.80, 115.19, 113.43, 113.21, 44.55, 12.71. HRMS (ESI) calculated for C<sub>22</sub>H<sub>23</sub>N<sub>2</sub>O<sup>+</sup>[M+H]<sup>+</sup>: 331.1805; found: 331.1804

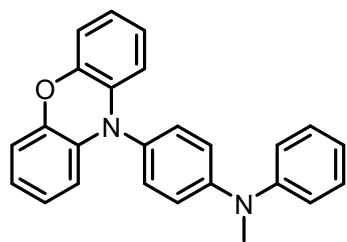

***N*-methyl-4-(10H-phenoxazin-10-yl)-*N*-phenylaniline(3e)**: white solid was obtained in 88% isolated yield. <sup>1</sup>H NMR (400 MHz, Chloroform-*d*) δ 7.34 – 7.24 (m, 2H), 7.15 – 7.11 (m, 2H), 7.08 – 6.93 (m, 5H), 6.62 – 6.47 (m, 6H), 5.97 – 5.86 (m, 2H), 3.29 (s, 3H). <sup>13</sup>C NMR (101 MHz, CDCl<sub>3</sub>) δ 148.90, 148.46, 144.09, 134.98, 131.24, 129.86, 129.69, 123.75, 123.32, 121.07, 119.16, 115.34, 113.35, 40.50. HRMS (ESI) calculated for C<sub>25</sub>H<sub>21</sub>N<sub>2</sub>O<sup>+</sup>[M+H]<sup>+</sup>: 365.1648; found: 365.1647.

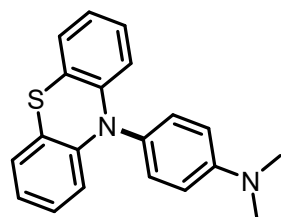

***N,N*-dimethyl-4-(10H-phenothiazin-10-yl)aniline (3g)**: white solid was obtained in 63% isolated yield. <sup>1</sup>H NMR (400 MHz, Chloroform-*d*) δ 7.21 (d, *J* = 8.9 Hz, 2H), 6.96 (d, *J* = 7.4 Hz, 2H), 6.87 (d, *J* = 8.9 Hz, 2H), 6.82 (t, *J* = 7.7 Hz, 2H), 6.75 (t, *J* = 7.3 Hz, 2H), 6.24 (d, *J* = 8.2 Hz, 2H), 3.03 (s, 6H). <sup>13</sup>C NMR (101 MHz, CDCl<sub>3</sub>) δ 150.07, 145.13, 131.71, 129.13, 126.91, 126.59, 122.09, 119.49, 115.77, 113.80, 40.67.

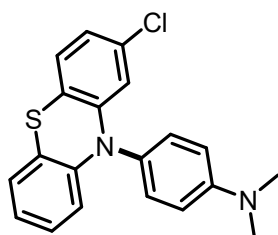

**4-(2-Chloro-10H-phenothiazin-10-yl)-N,N-dimethylaniline (3h):** white solid was obtained in 37% isolated yield.  $^1\text{H}$  NMR (400 MHz, Chloroform-*d*)  $\delta$  7.18 (d,  $J$  = 8.9 Hz, 2H), 6.95 (dd,  $J$  = 7.3, 1.7 Hz, 1H), 6.90 – 6.85 (m, 3H), 6.85 – 6.71 (m, 3H), 6.25 – 6.20 (m, 2H), 3.06 (s, 6H).  $^{13}\text{C}$  NMR (101 MHz,  $\text{CDCl}_3$ )  $\delta$  150.27, 146.33, 144.55, 132.73, 131.43, 128.39, 127.18, 127.11, 126.61, 122.59, 121.85, 119.23, 118.00, 116.12, 115.76, 40.64.

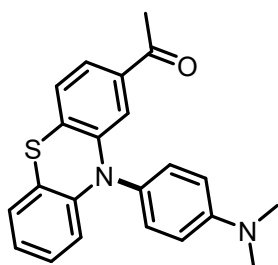

**1-(10-(4-(dimethylamino)phenyl)-10H-phenothiazin-2-yl)ethan-1-one (3i):** yellow solid was obtained in 61% isolated yield.  $^1\text{H}$  NMR (400 MHz, Chloroform-*d*)  $\delta$  7.31 (dd,  $J$  = 7.9, 1.7 Hz, 1H), 7.19 (d,  $J$  = 8.9 Hz, 2H), 6.99 (d,  $J$  = 7.9 Hz, 1H), 6.94 – 6.86 (m, 3H), 6.85 – 6.74 (m, 3H), 6.20 (dd,  $J$  = 8.2, 1.4 Hz, 1H), 3.05 (s, 6H), 2.36 (s, 3H).  $^{13}\text{C}$  NMR (101 MHz,  $\text{CDCl}_3$ )  $\delta$  197.45, 150.26, 145.18, 144.55, 136.03, 131.36, 128.38, 127.38, 126.72, 126.50, 126.26, 122.44, 118.31, 116.17, 114.39, 114.04, 40.62, 26.57.

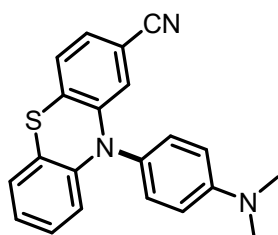

**10-(4-(Dimethylamino)phenyl)-10H-phenothiazine-2-carbonitrile (3j):** yellow solid was obtained in 54% isolated yield.  $^1\text{H}$  NMR (400 MHz, Chloroform-*d*)  $\delta$  7.14 (d,  $J$  = 8.9 Hz, 2H), 7.00 – 6.76 (m, 7H), 6.34 (s, 1H), 6.22 (d,  $J$  = 8.0 Hz, 1H), 3.07 (s, 6H).  $^{13}\text{C}$  NMR (101 MHz,  $\text{CDCl}_3$ )  $\delta$  150.45, 145.63, 143.84, 131.11, 127.57, 126.77, 126.68, 126.55, 125.43, 122.96, 119.28, 117.89, 117.78, 116.24, 114.14, 110.13, 40.59.

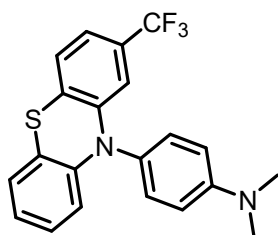

***N,N*-Dimethyl-4-(2-(trifluoromethyl)-10H-phenothiazin-10-yl)aniline(3k)**: white solid was obtained in 50 % isolated yield.  $^1\text{H}$  NMR (400 MHz, Chloroform-*d*)  $\delta$  7.19 (d,  $J = 9.0$  Hz, 2H), 7.04 – 6.76 (m, 7H), 6.43 (s, 1H), 6.21 (dd,  $J = 8.1, 1.3$  Hz, 1H), 3.06 (s, 6H).  $^{13}\text{C}$  NMR (101 MHz,  $\text{CDCl}_3$ )  $\delta$  150.15, 145.39, 144.34, 131.18, 129.18(q,  $J_{\text{C-F}} = 31.0$  Hz), 127.94, 127.19, 126.49, 126.44, 125.27, 124.20, 122.58, 118.53(q,  $J_{\text{C-F}} = 4.0$  Hz), 116.05, 113.83, 111.74(q,  $J_{\text{C-F}} = 4.0$  Hz), 40.44.  $^{19}\text{F}$  NMR (377 MHz,  $\text{CDCl}_3$ )  $\delta$  -62.84.

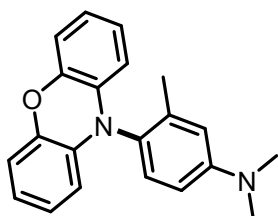

***N,N*, 3-trimethyl-4-(10H-phenoxazin-10-yl) aniline(3m)**: white solid was obtained in 63% isolated yield.  $^1\text{H}$  NMR (400 MHz, Chloroform-*d*)  $\delta$  7.11 – 7.03 (m, 1H), 6.75 – 6.52 (m, 8H), 5.89 – 5.80 (m, 2H), 3.01 (s, 6H), 2.17 (s, 3H).  $^{13}\text{C}$  NMR (101 MHz,  $\text{CDCl}_3$ )  $\delta$  150.51, 144.08, 139.21, 134.32, 131.29, 125.46, 123.49, 120.80, 115.23, 114.98, 112.81, 112.11, 40.68, 18.22. HRMS (ESI) calculated for  $\text{C}_{21}\text{H}_{21}\text{N}_2\text{O}^+[\text{M}+\text{H}]^+$ : 317.1648; found: 317.1645.

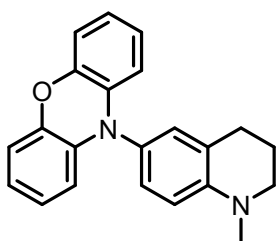

**10-(1-methyl-1,2,3,4-tetrahydroquinolin-6-yl)-10H-phenoxazine(3n)**: white solid was obtained in 82% isolated yield.  $^1\text{H}$  NMR (400 MHz, Chloroform-*d*)  $\delta$  6.96 (dd,  $J = 8.5, 2.4$  Hz, 1H), 6.86 (d,  $J = 2.3$  Hz, 1H), 6.71 – 6.55 (m, 7H), 6.00 (m, 2H), 3.33 – 3.27 (m, 2H), 2.95 (s, 3H), 2.78 (t,  $J = 6.4$  Hz, 2H), 2.02 (m, 2H).  $^{13}\text{C}$  NMR (101 MHz,  $\text{CDCl}_3$ )  $\delta$  146.45, 144.11, 135.33, 130.33, 128.99, 126.64, 125.11, 123.27, 120.78, 115.18, 113.44, 112.28, 51.27, 39.21, 27.93, 22.30. HRMS (ESI) calculated for  $\text{C}_{22}\text{H}_{21}\text{N}_2\text{O}^+[\text{M}+\text{H}]^+$ : 329.1648; found: 329.1642.

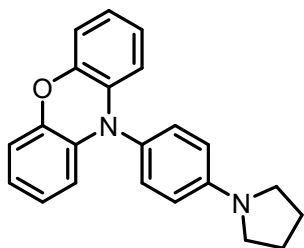

**10-(4-(pyrrolidin-1-yl)phenyl)-10H-phenoxazine(3o):** white solid was obtained in 83% isolated yield.  $^1\text{H}$  NMR (400 MHz, Chloroform-*d*)  $\delta$  7.12 (d,  $J = 8.7$  Hz, 2H), 6.69 (d,  $J = 8.8$  Hz, 2H), 6.65 – 6.54 (m, 6H), 5.97 (m, 2H), 3.34 (t,  $J = 6.5$  Hz, 4H), 2.08 – 2.01 (m, 4H).  $^{13}\text{C}$  NMR (101 MHz,  $\text{CDCl}_3$ )  $\delta$  147.57, 144.12, 135.40, 131.30, 126.06, 123.29, 120.81, 115.20, 113.33, 47.80, 25.72. HRMS (ESI) calculated for  $\text{C}_{22}\text{H}_{21}\text{N}_2\text{O}^+[\text{M}+\text{H}]^+$ : 329.1648; found: 329.1646.

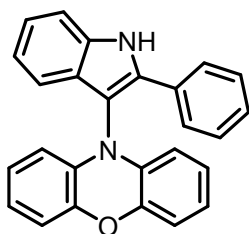

**10-(2-phenyl-1H-indol-3-yl)-10H-phenoxazine(3p):** pale red solid was obtained in 96% isolated yield.  $^1\text{H}$  NMR (400 MHz,  $\text{DMSO}-d_6$ )  $\delta$  11.95 (s, 1H), 7.86 (d,  $J = 8.5$  Hz, 2H), 7.55 (d,  $J = 8.1$  Hz, 1H), 7.45 (t,  $J = 7.8$  Hz, 2H), 7.36 – 7.16 (m, 3H), 7.00 (t,  $J = 7.8$  Hz, 1H), 6.78-6.75 (m, 2H), 6.66-6.54 (m, 4H), 5.95 (dd,  $J = 7.9, 1.5$  Hz, 2H).  $^{13}\text{C}$  NMR (101 MHz,  $\text{DMSO}$ )  $\delta$  143.72, 135.82, 134.84, 133.23, 130.59, 129.22, 128.39, 126.07, 124.05, 122.87, 121.64, 120.17, 117.71, 115.48, 113.43, 112.39, 109.16. HRMS (ESI) calculated for  $\text{C}_{26}\text{H}_{19}\text{N}_2\text{O}^+[\text{M}+\text{H}]^+$ : 375.1492; found: 375.1482.

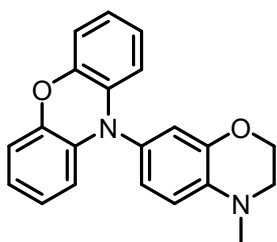

**10-(4-methyl-3,4-dihydro-2H-benzo[b][1,4]oxazin-7-yl)-10H-phenoxazine(3q):** white solid was obtained in 60% isolated yield.  $^1\text{H}$  NMR (400 MHz, Chloroform-*d*)  $\delta$  6.81 (s, 2H), 6.75 (s, 1H), 6.72 – 6.58 (m, 7H), 6.10 – 6.02 (m, 2H), 4.42 – 4.35 (m, 2H), 3.44 – 3.32 (m, 2H), 2.99 (s, 3H).  $^{13}\text{C}$  NMR (101 MHz,  $\text{CDCl}_3$ )  $\delta$  145.65, 143.93, 136.59, 134.93, 128.44, 123.18, 120.86, 117.55, 115.14, 113.57,

113.38, 64.95, 48.87, 38.72. HRMS (ESI) calculated for  $C_{21}H_{19}N_2O_2^+[M+H]^+$ : 331.1441; found: 331.1435.

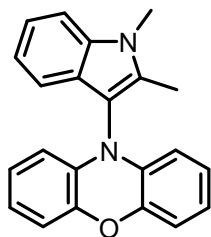

**10-(1,2-dimethyl-1H-indol-3-yl)-10H-phenoxazine(3r):** white solid was obtained in 33% isolated yield.  $^1H$  NMR (400 MHz, Chloroform-*d*)  $\delta$  7.43 (dd,  $J = 8.0, 5.1$  Hz, 2H), 7.29-7.25 (m, 1H), 7.11 (t,  $J = 7.4$  Hz, 1H), 6.77 – 6.56 (m, 6H), 6.04 (dd,  $J = 7.9, 1.5$  Hz, 2H), 3.81 (s, 3H), 2.35 (s, 3H).  $^{13}C$  NMR (101 MHz,  $CDCl_3$ )  $\delta$  144.41, 136.32, 135.64, 134.34, 123.96, 123.56, 121.65, 121.11, 119.93, 118.14, 115.34, 113.43, 110.05, 109.27, 30.04, 9.81. HRMS (ESI) calculated for  $C_{22}H_{19}N_2O^+[M+H]^+$ : 327.1492; found: 327.1490.

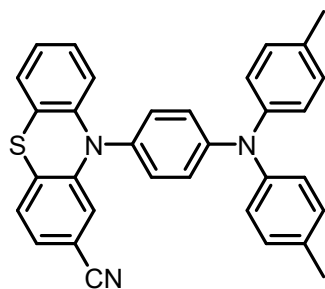

**10-(4-(di-p-tolylamino)phenyl)-10H-phenothiazine-2-carbonitrile(5a):** yellow solid was obtained in 51% isolated yield.  $^1H$  NMR (400 MHz, Chloroform-*d*)  $\delta$  7.14 (s, 10H), 7.09 – 7.05 (m, 2H), 7.01 – 6.94 (m, 2H), 6.92 – 6.85 (m, 2H), 6.82-6.78 (m, 1H), 6.43 (d,  $J = 1.4$  Hz, 1H), 6.28 – 6.22 (m, 1H), 2.34 (s, 6H).  $^{13}C$  NMR (101 MHz,  $CDCl_3$ )  $\delta$  148.81, 145.18, 144.55, 143.50, 133.94, 131.11, 131.06, 130.33, 127.59, 126.94, 126.88, 126.65, 125.86, 125.66, 123.14, 122.17, 119.25, 118.10, 117.73, 116.23, 110.14, 21.04. HRMS (ESI) calculated for  $C_{33}H_{26}N_3S^+[M+H]^+$ : 497.1876; found: 497.1876.

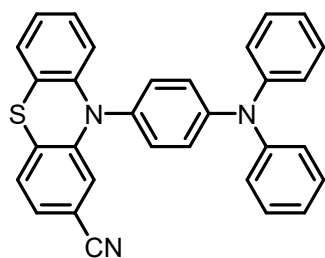



**10-(4-(diphenylamino)phenyl)-10H-phenothiazine-2-carbonitrile(5b):** yellow solid was obtained in 31% isolated yield <sup>1</sup>H NMR (400 MHz, DMSO-*d*<sub>6</sub>) δ 7.40-7.36 (m, 4H), 7.27 – 7.10 (m, 12H), 7.09 – 6.92 (m, 3H), 6.87 (t, *J* = 7.0 Hz, 1H), 6.41 (d, *J* = 1.3 Hz, 1H), 6.22 (d, *J* = 8.2 Hz, 1H). <sup>13</sup>C NMR (101 MHz, DMSO) δ 147.76, 146.66, 144.40, 142.89, 131.82, 131.32, 129.90, 129.63, 128.00, 127.50, 126.74, 126.44, 126.22, 125.36, 124.26, 123.43, 122.96, 118.73, 117.58, 117.10, 116.30, 109.69. HRMS (ESI) calculated for C<sub>31</sub>H<sub>22</sub>N<sub>3</sub>S<sup>+</sup>[M+H]<sup>+</sup>: 468.1534; found: 468.1525.

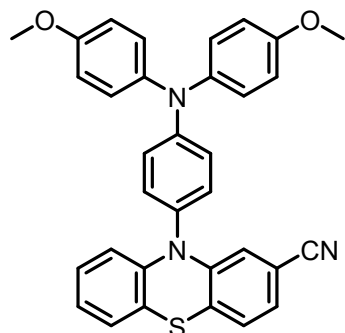

**10-(4-(bis(4-methoxyphenyl)amino)phenyl)-10H-phenothiazine-2-carbonitrile(5c):** yellow solid was obtained in 67% isolated yield <sup>1</sup>H NMR (400 MHz, DMSO-*d*<sub>6</sub>) δ 7.24 – 7.15 (m, 8H), 7.03-7.00 (m, 1H), 6.99 – 6.95 (m, 5H), 6.92 – 6.86 (m, 3H), 6.35 (d, *J* = 1.5 Hz, 1H), 6.18 (dd, *J* = 8.2, 0.9 Hz, 1H), 3.75 (s, 6H). <sup>13</sup>C NMR (101 MHz, DMSO) δ 156.59, 148.92, 144.62, 143.07, 139.33, 131.03, 129.54, 127.99, 127.50, 126.72, 126.34, 126.10, 123.36, 119.09, 118.79, 117.42, 116.99, 116.23, 115.26, 109.62, 55.37. HRMS (ESI) calculated for C<sub>33</sub>H<sub>26</sub>O<sub>2</sub>N<sub>3</sub>S<sup>+</sup>[M+H]<sup>+</sup>: 528.1746; found: 528.1740.

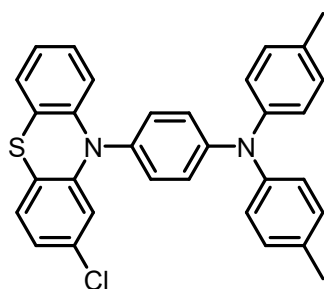

**4-(2-chloro-10H-phenothiazin-10-yl)-N,N-di-p-tolylaniline(5d):** white solid was obtained in 30% isolated yield. <sup>1</sup>H NMR (400 MHz, Chloroform-*d*) δ 7.18 – 7.09 (m, 12H), 6.98-6.95 (m, 1H), 6.92 – 6.86 (m, 2H), 6.83 – 6.74 (m, 2H), 6.30-6.28 (m, 2H), 2.34 (s, 6H). <sup>13</sup>C NMR (101 MHz, CDCl<sub>3</sub>) δ 148.50, 145.92, 144.78, 144.19, 133.72, 132.74, 132.16, 131.38, 130.30, 127.31, 127.15, 126.74, 125.65, 122.81, 122.49, 122.08, 119.51, 118.30, 116.16, 115.84, 21.05. HRMS (ESI) calculated for C<sub>32</sub>H<sub>26</sub>N<sub>2</sub>ClS<sup>+</sup>[M+H]<sup>+</sup>: 505.1500; found: 505.1496.

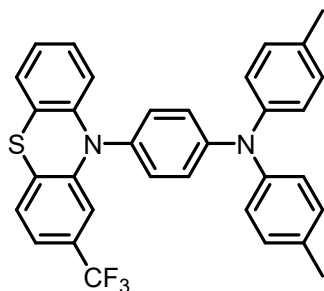

**4-methyl-N-(p-tolyl)-N-(4-(2-(trifluoromethyl)-10H-phenothiazin-10-yl)phenyl)aniline(5e):** white solid was obtained in 20% isolated yield.  $^1\text{H}$  NMR (400 MHz, DMSO- $d_6$ )  $\delta$  7.24 – 7.20 (m, 3H), 7.17-7.12 (m, 5H), 7.07-7.01 (m, 7H), 6.98 – 6.94 (m, 1H), 6.89-6.84 (m, 1H), 6.32 (d,  $J$  = 2.1 Hz, 1H), 6.24 (dd,  $J$  = 8.3, 1.3 Hz, 1H), 2.27 (s, 6H).  $^{13}\text{C}$  NMR (101 MHz, DMSO)  $\delta$  148.14, 144.59, 144.19, 143.10, 133.52, 131.36, 131.28, 130.40, 128.02(q,  $J_{\text{C-F}}$  = 39.0 Hz), 126.74, 125.41, 124.51, 123.33, 122.01, 119.01(q,  $J_{\text{C-F}}$  = 4.0 Hz), 117.67, 116.14, 110.88 (q,  $J_{\text{C-F}}$  = 4.0 Hz), 20.54.  $^{19}\text{F}$  NMR (377 MHz, DMSO)  $\delta$  -61.76. HRMS (ESI) calculated for  $\text{C}_{32}\text{H}_{26}\text{N}_2\text{F}_3\text{S}^+[\text{M}+\text{H}]^+$ : 539.1763; found: 539.1756.

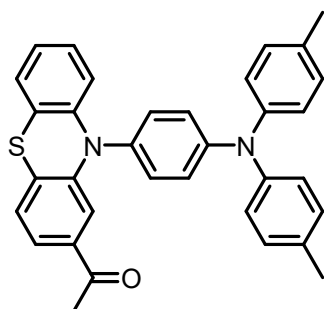

**1-(10-(4-(di-p-tolylamino)phenyl)-10H-phenothiazin-2-yl)ethan-1-one(5f):** yellow solid was obtained in 45% isolated yield.  $^1\text{H}$  NMR (400 MHz, DMSO- $d_6$ )  $\delta$  7.42 (dd,  $J$  = 8.0, 1.7 Hz, 1H), 7.21 – 7.11 (m, 7H), 7.08 – 6.99 (m, 7H), 6.96 – 6.91 (m, 1H), 6.85-6.80 (m, 1H), 6.67 (d,  $J$  = 1.6 Hz, 1H), 6.22 (dd,  $J$  = 8.2, 0.9 Hz, 1H), 2.36 (s, 3H), 2.27 (s, 6H).  $^{13}\text{C}$  NMR (101 MHz, DMSO)  $\delta$  196.67, 147.92, 144.30, 143.99, 143.25, 135.75, 133.33, 131.98, 131.33, 130.36, 127.79, 126.62, 126.49, 125.75, 125.24, 123.30, 122.87, 122.33, 117.58, 115.96, 113.52, 26.39, 20.54. HRMS (ESI) calculated for  $\text{C}_{34}\text{H}_{29}\text{ON}_2\text{S}^+[\text{M}+\text{H}]^+$ : 513.1995; found: 513.1994.

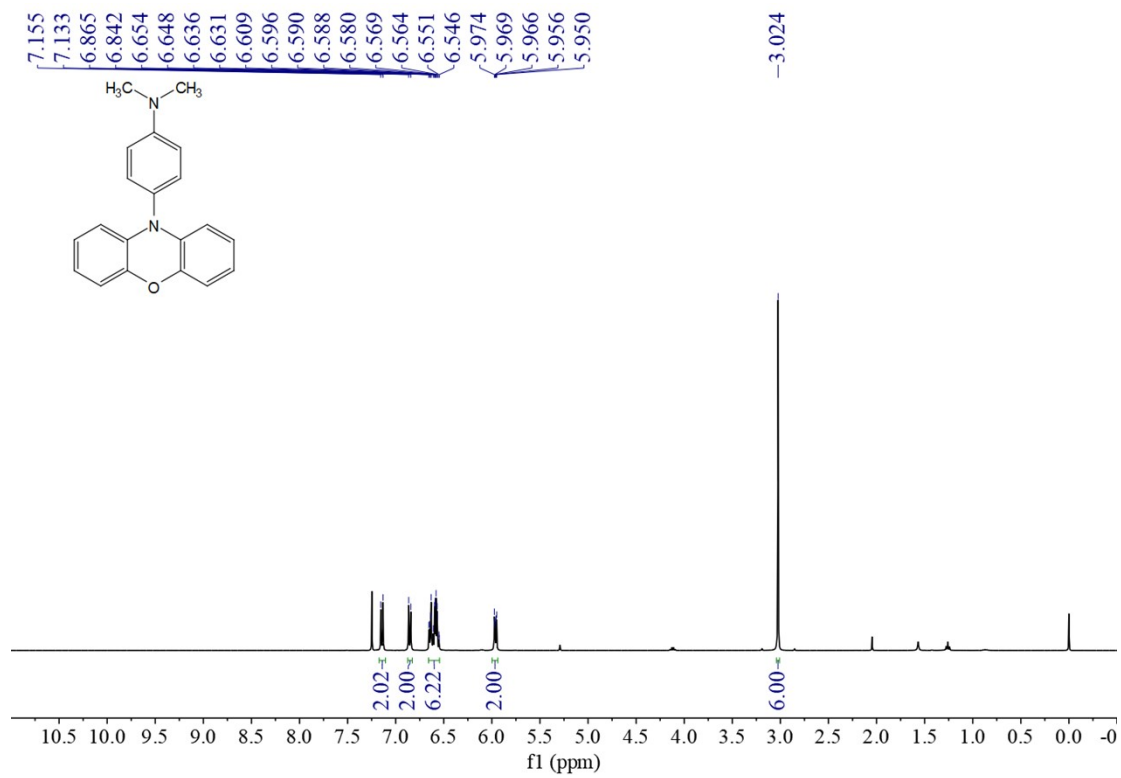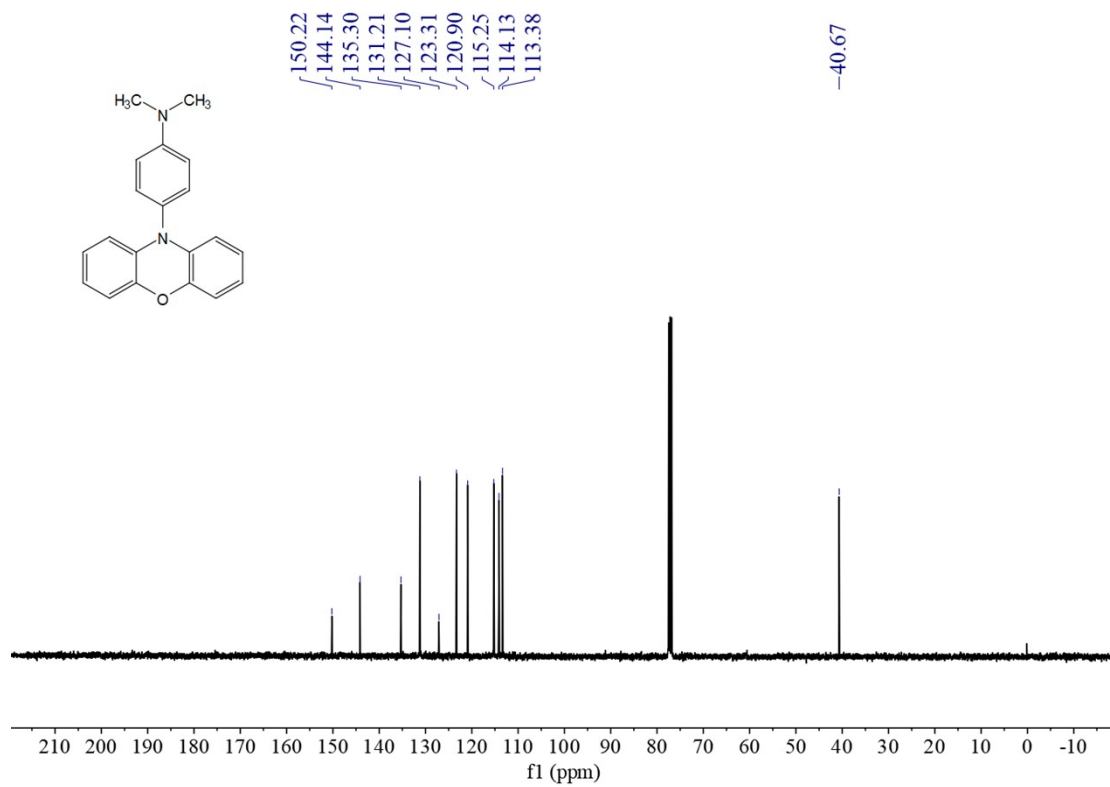

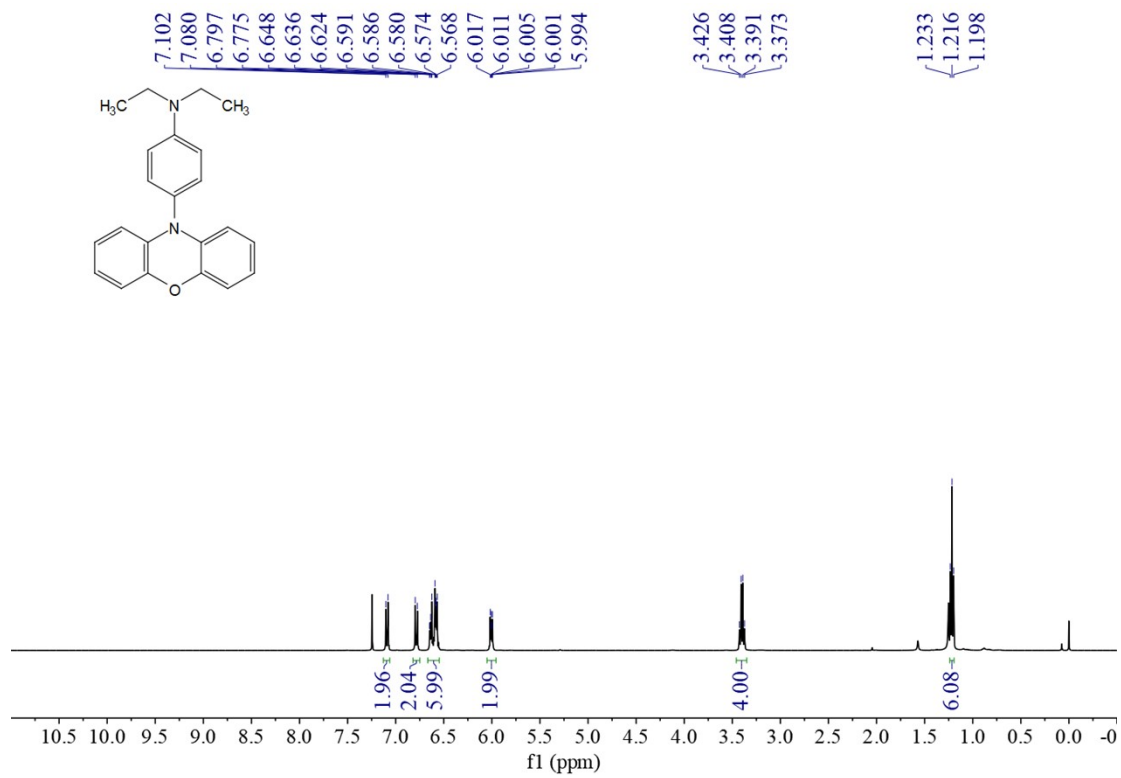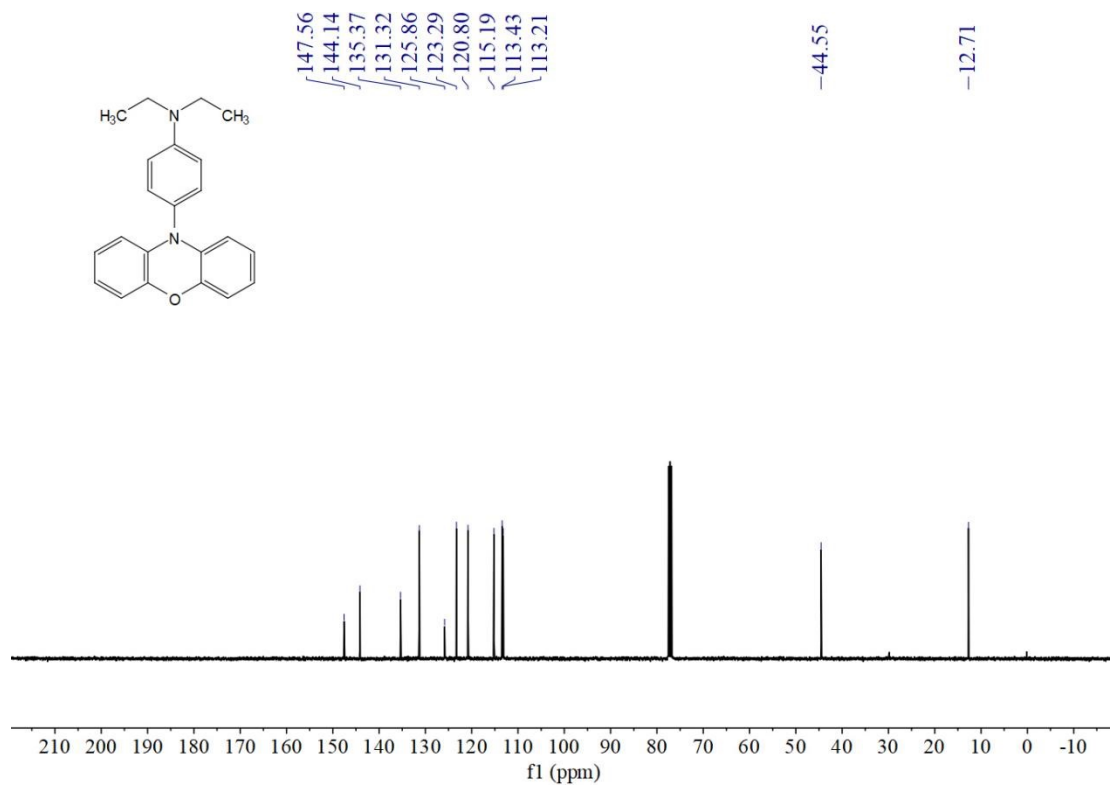

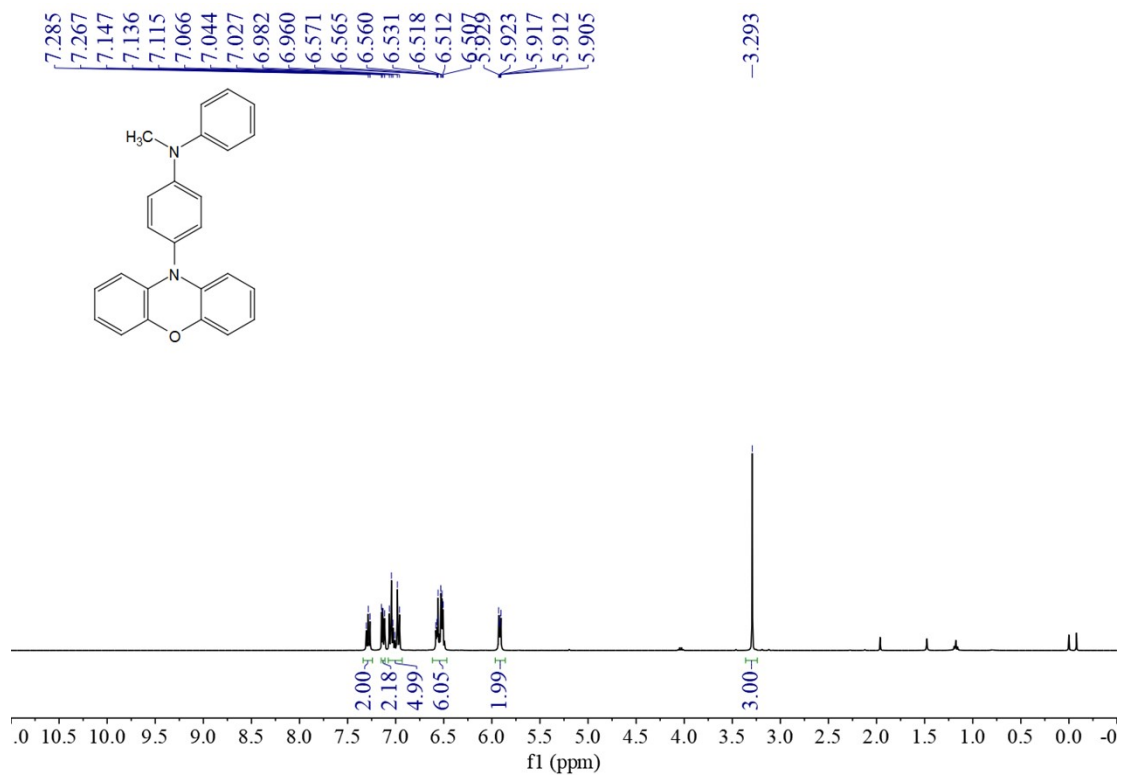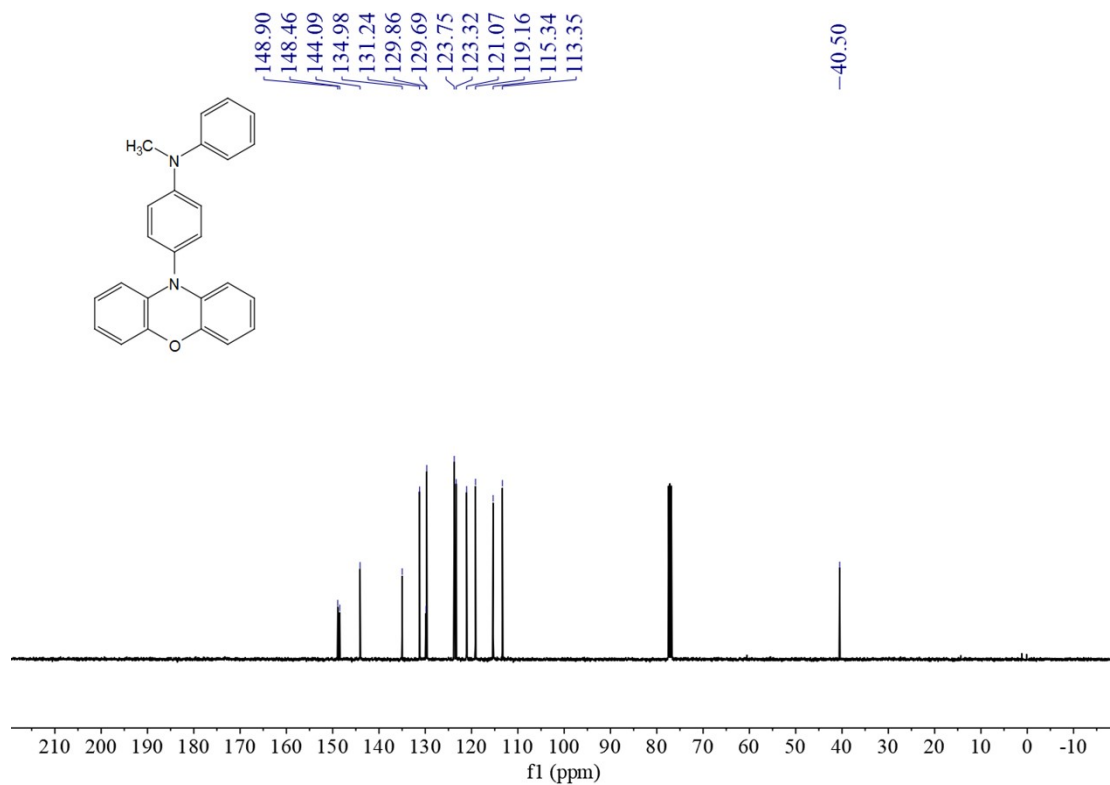

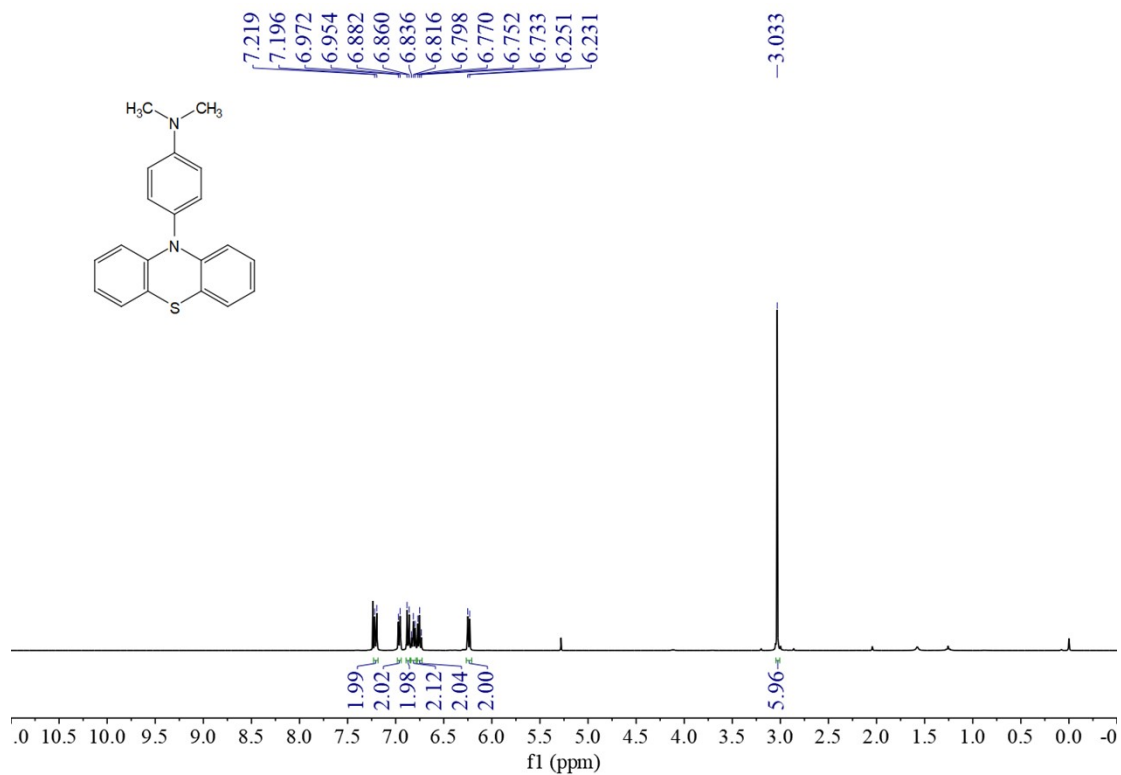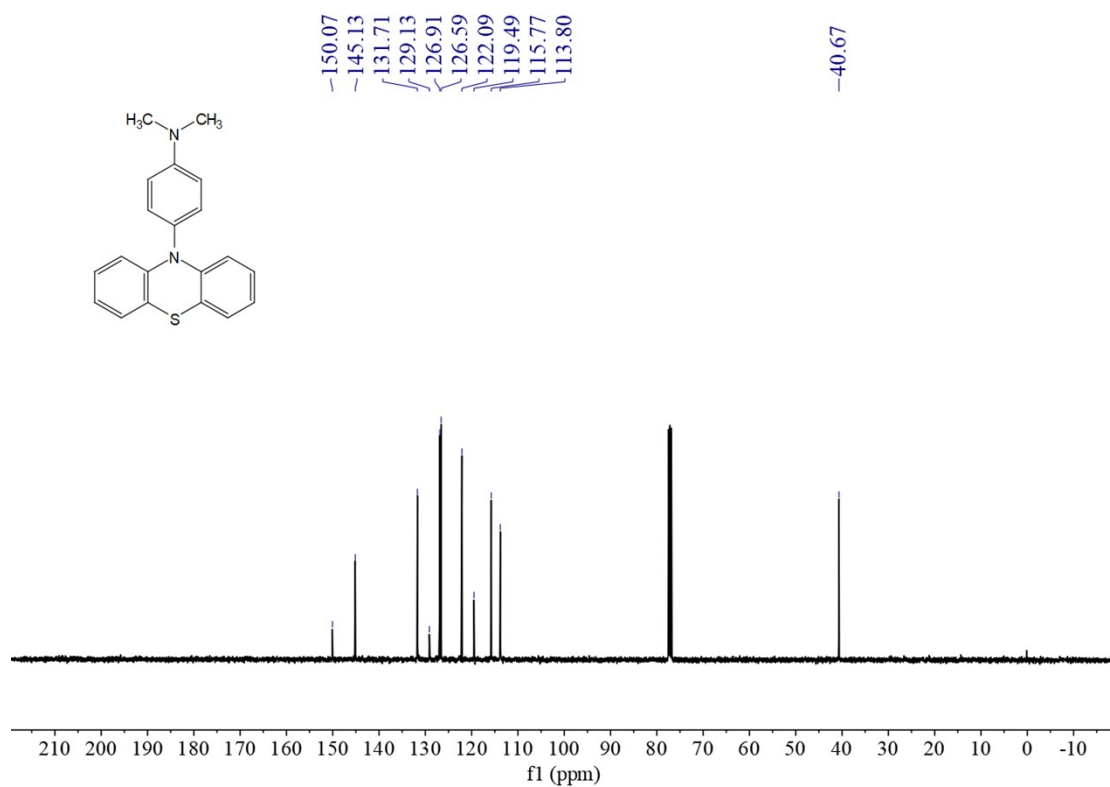

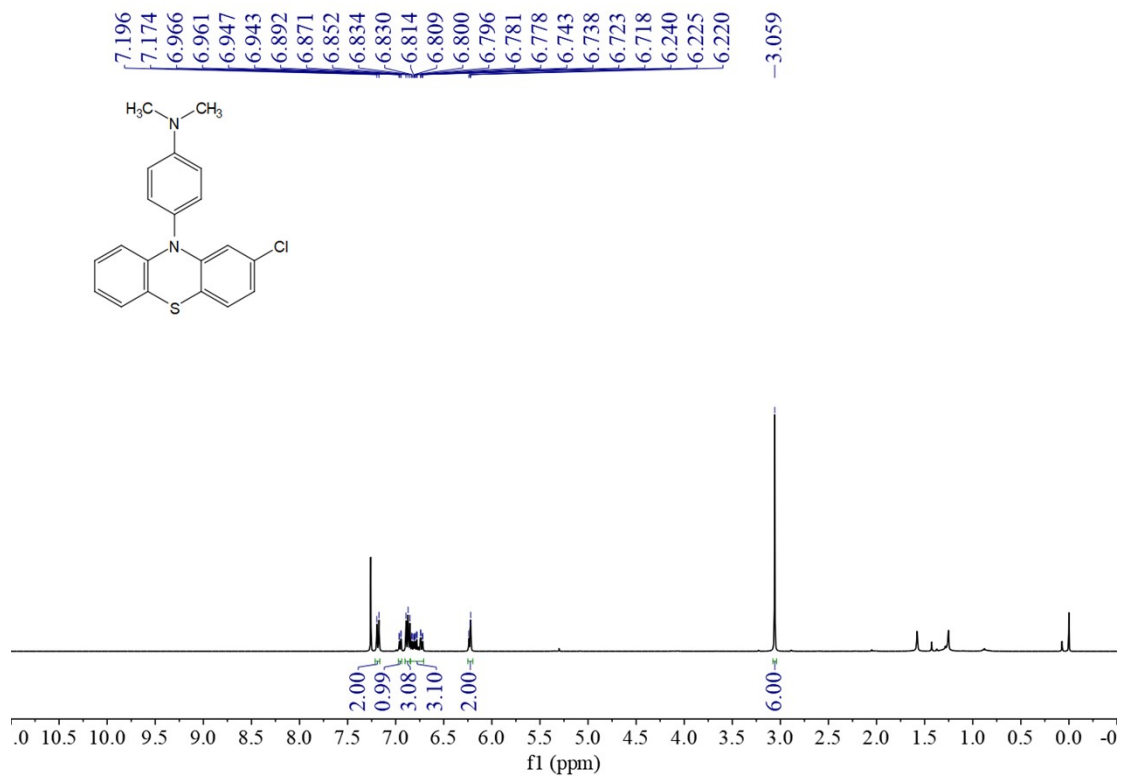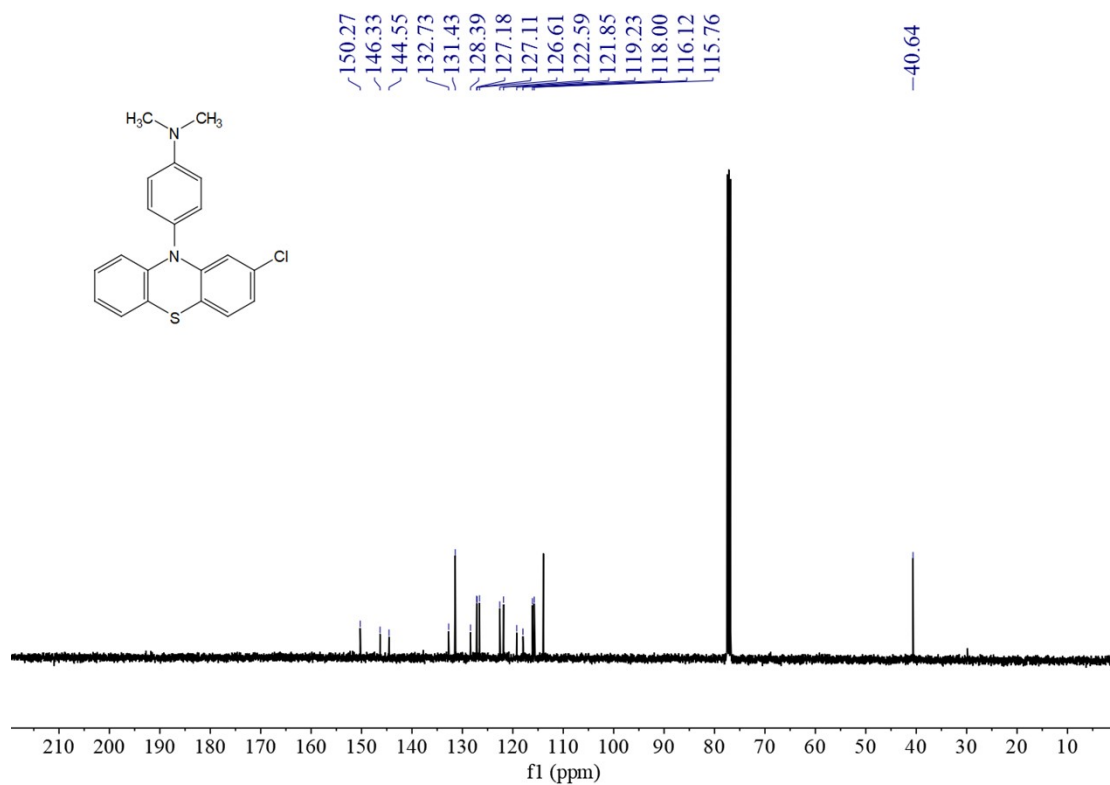

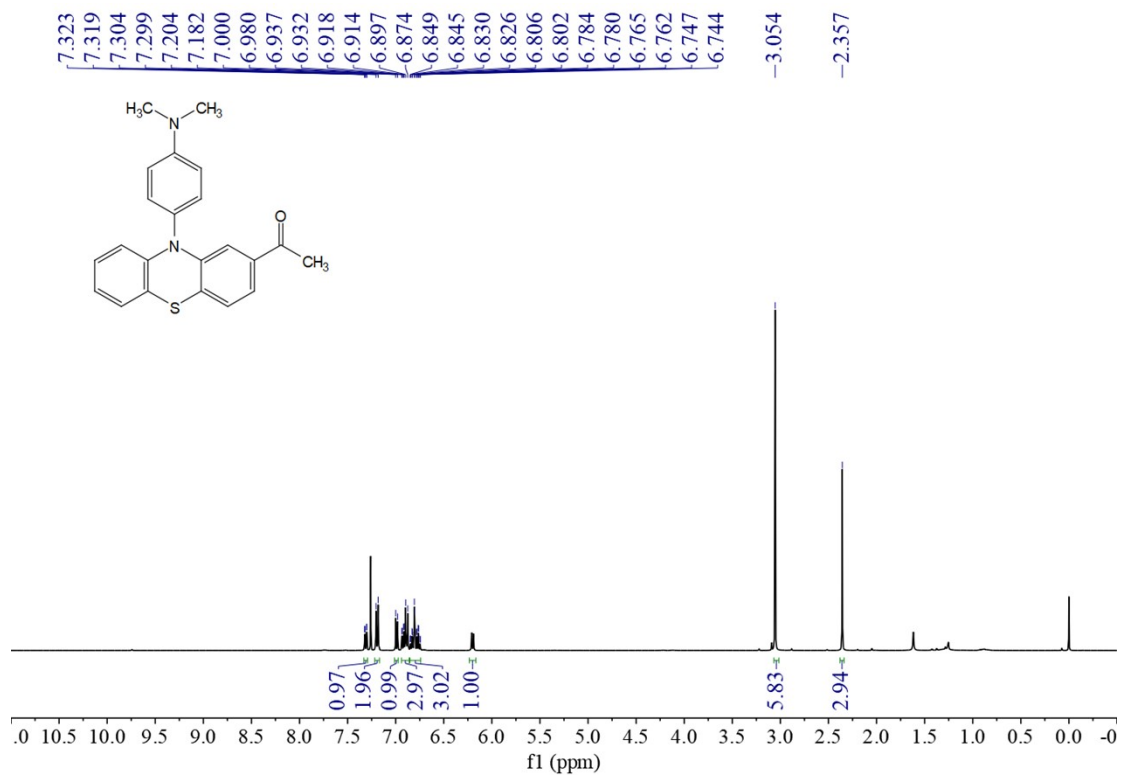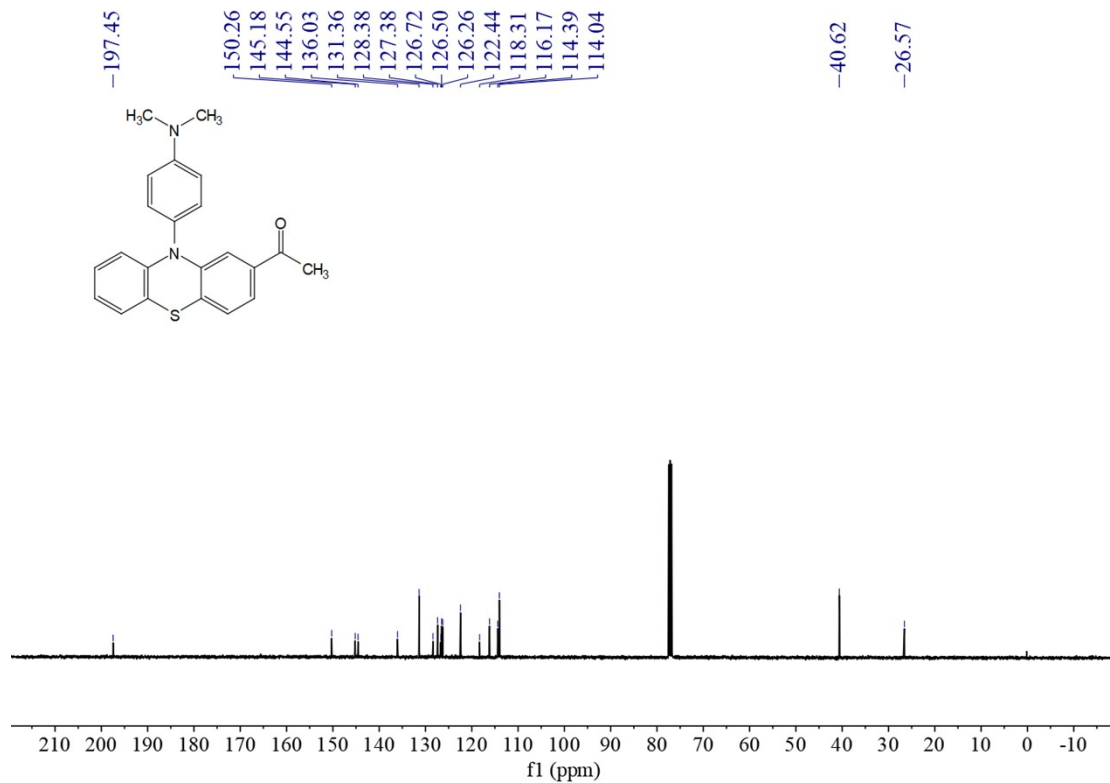



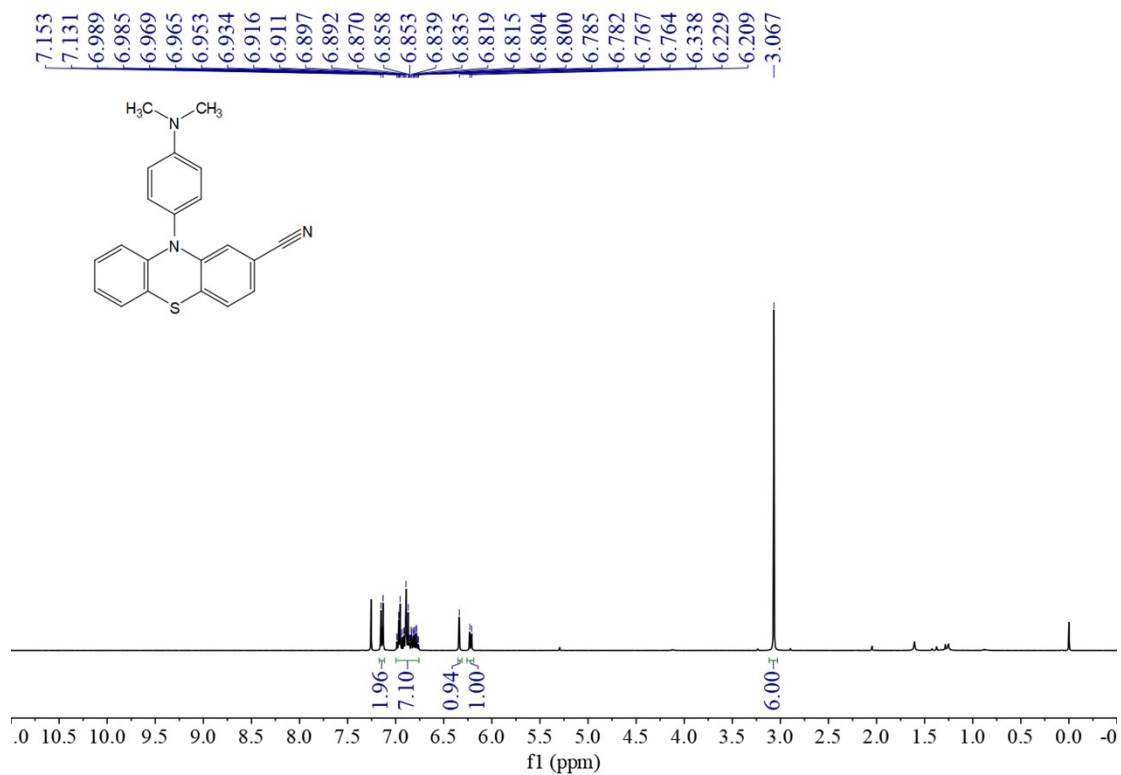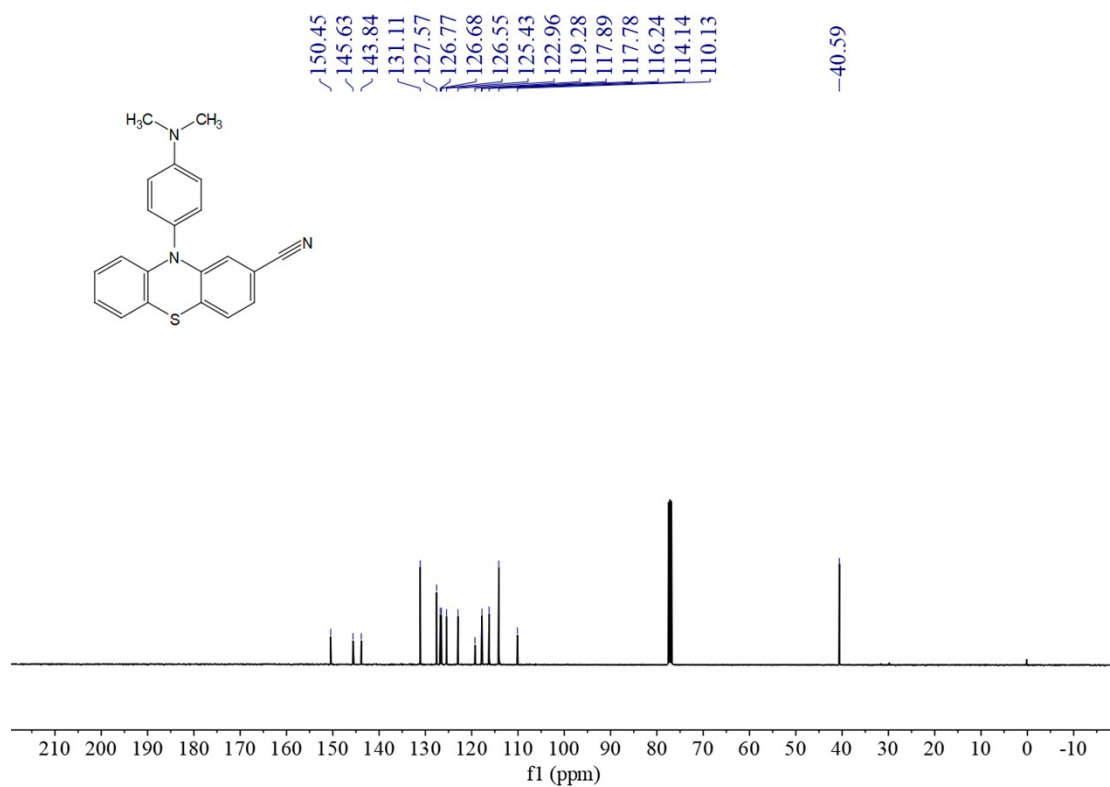

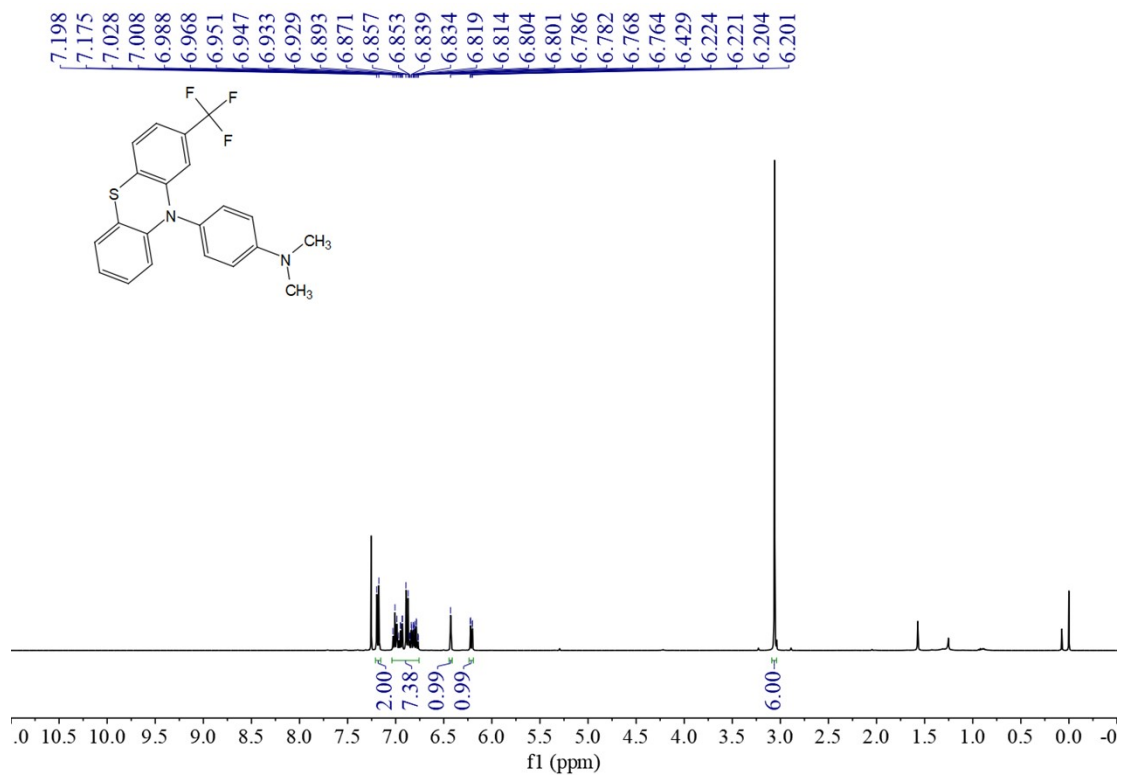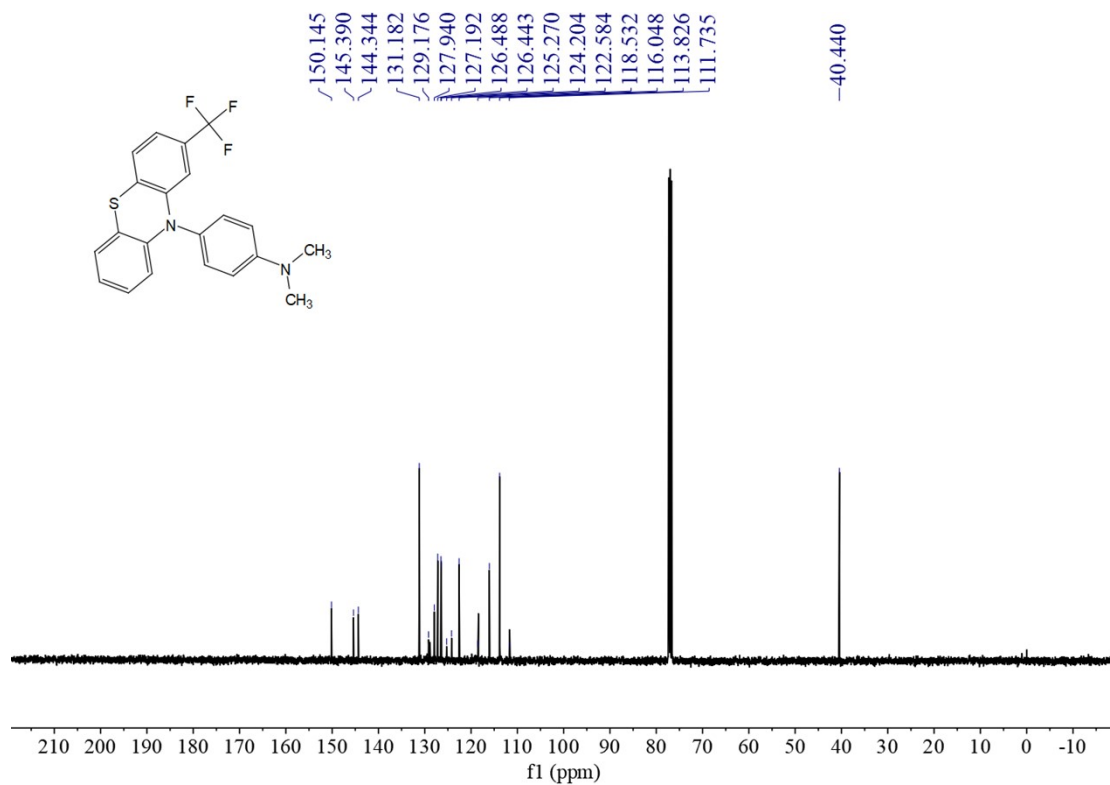

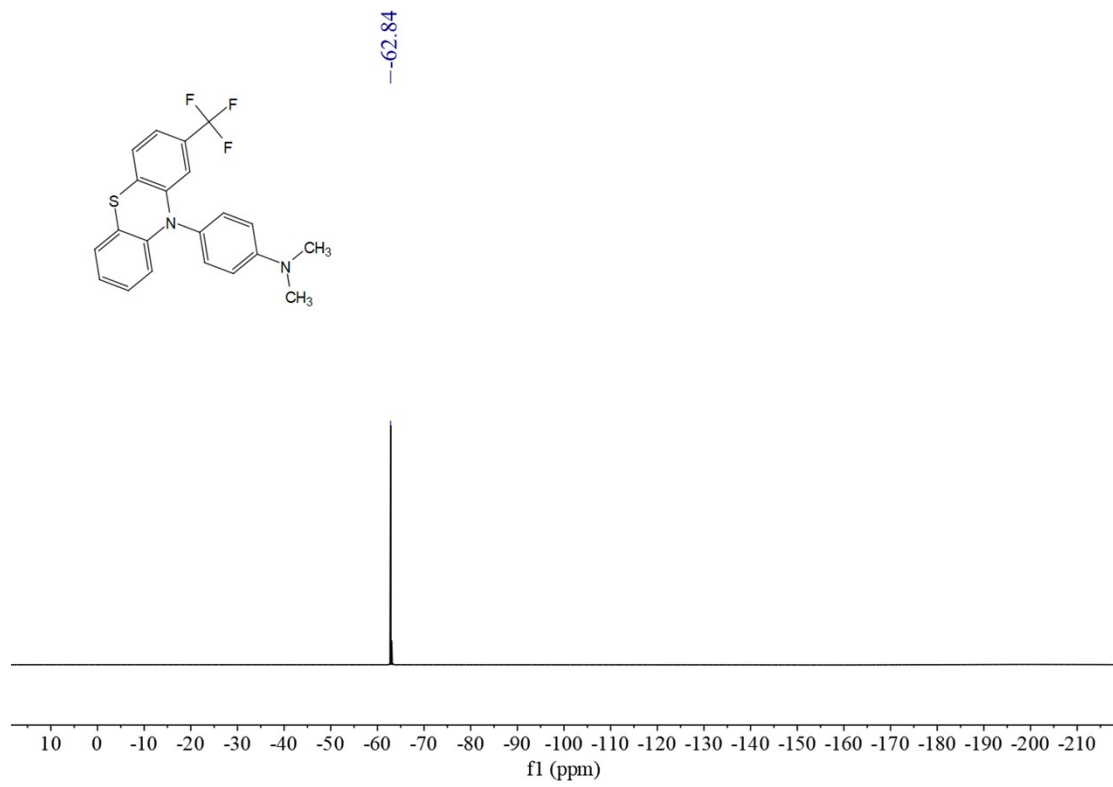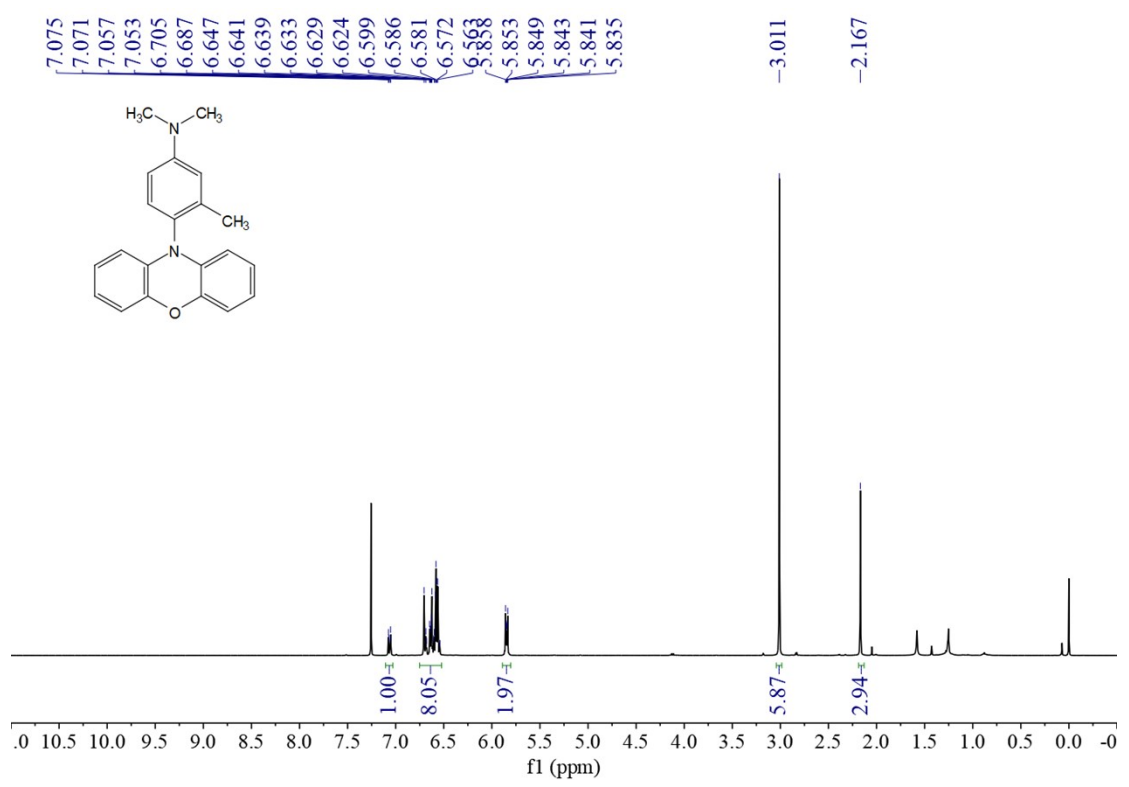

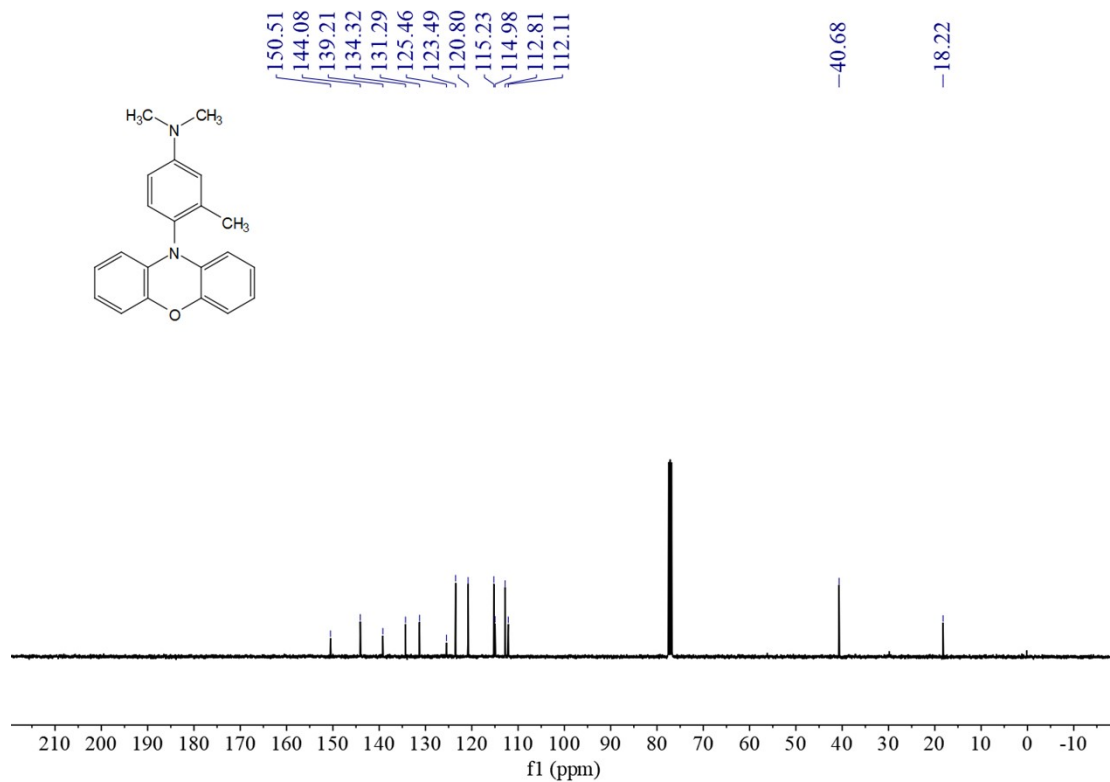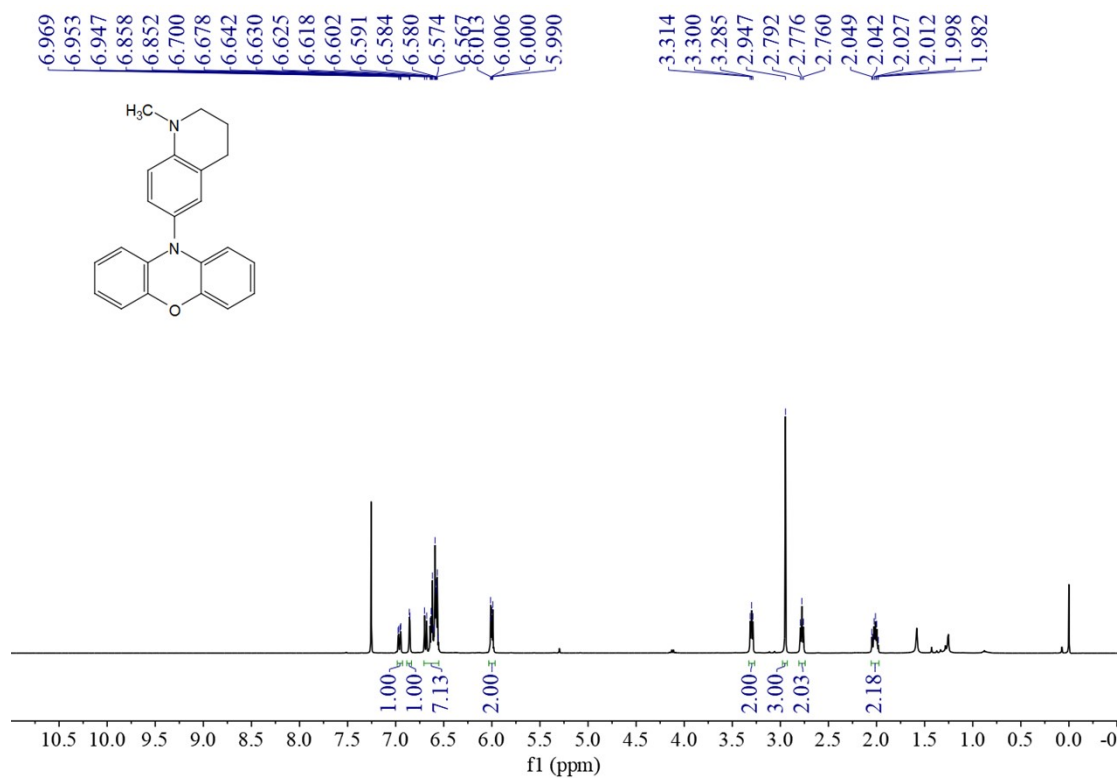

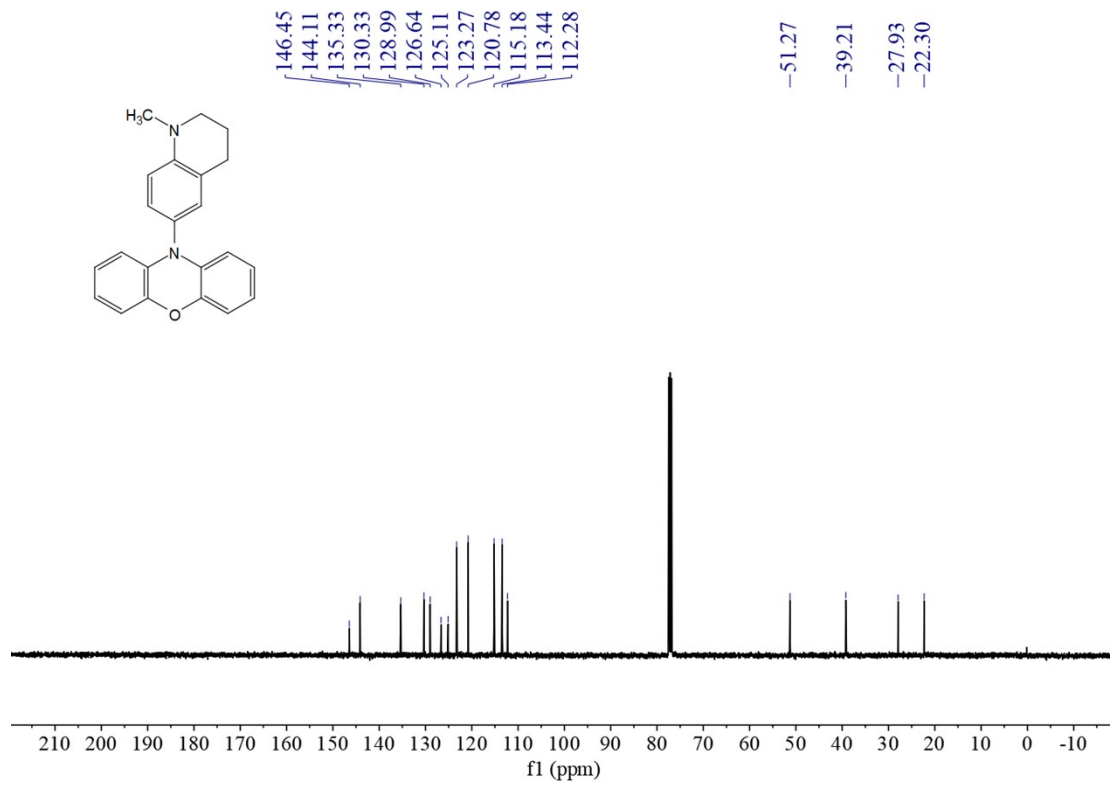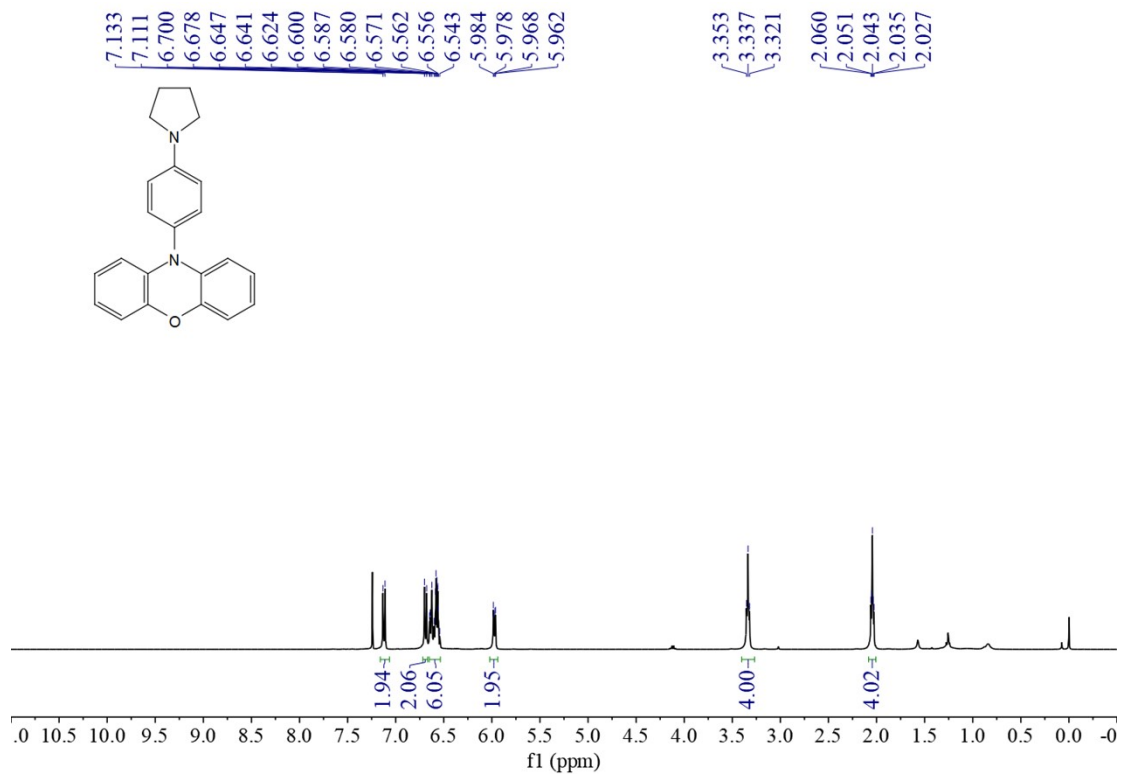

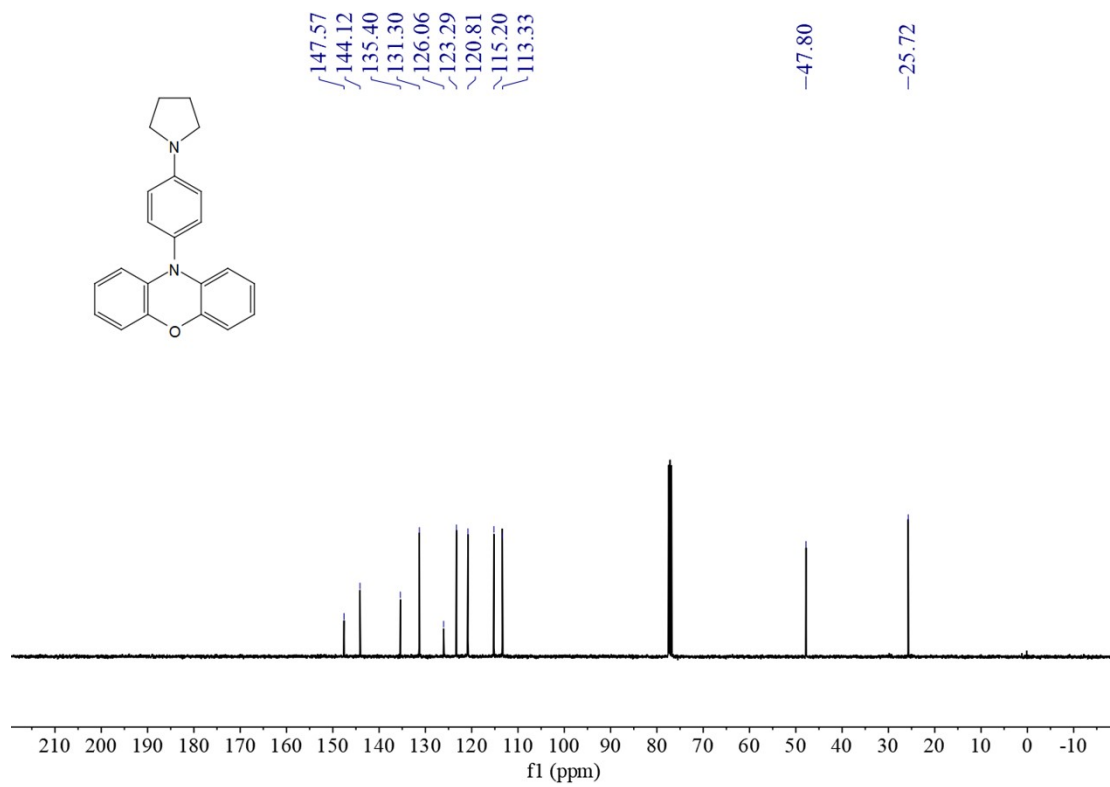

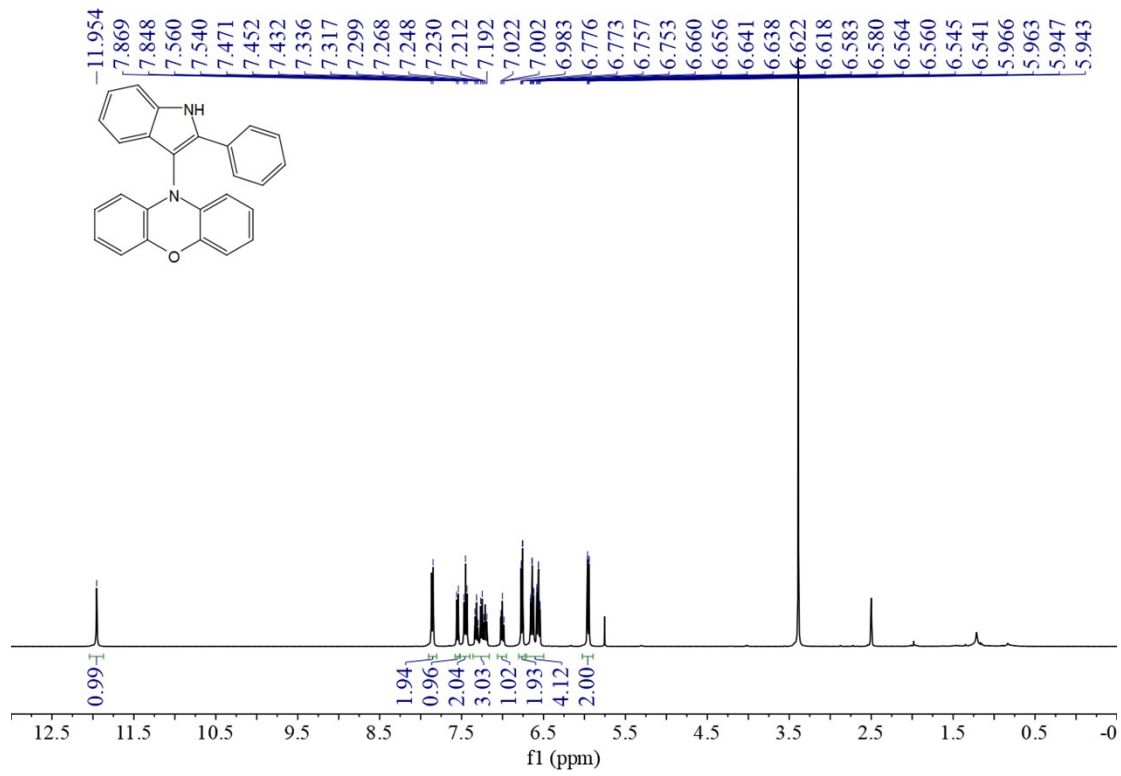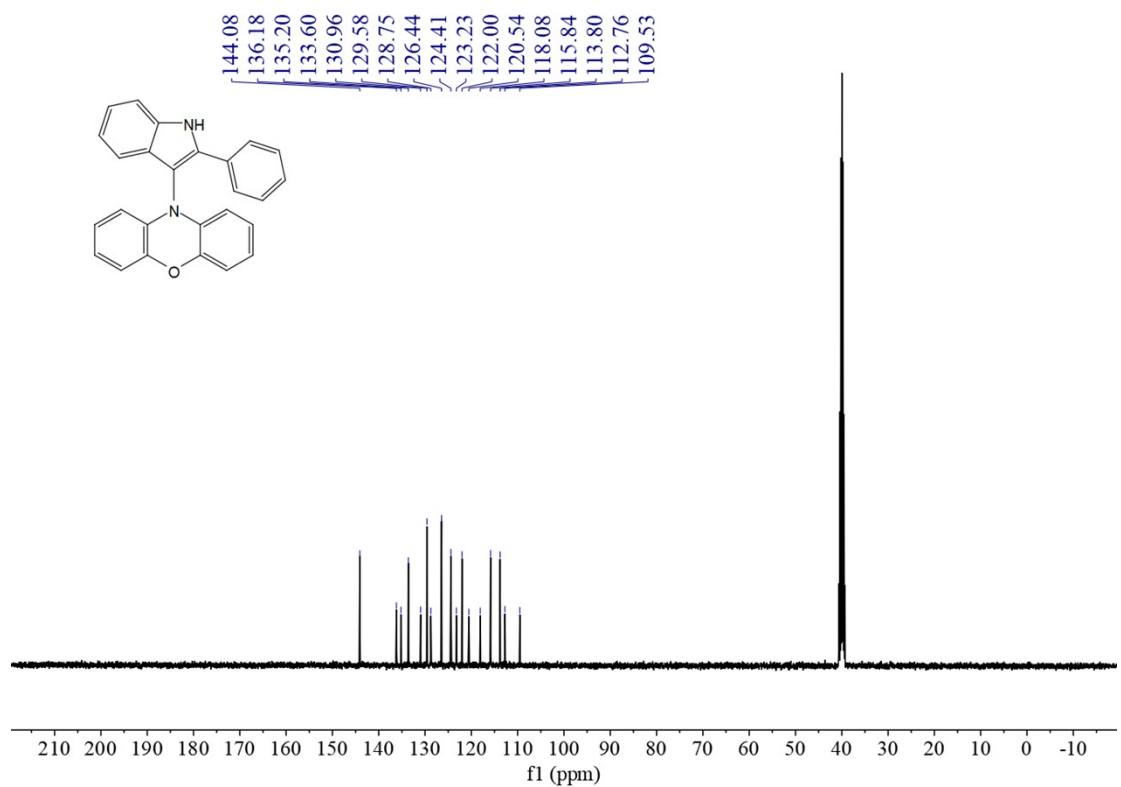

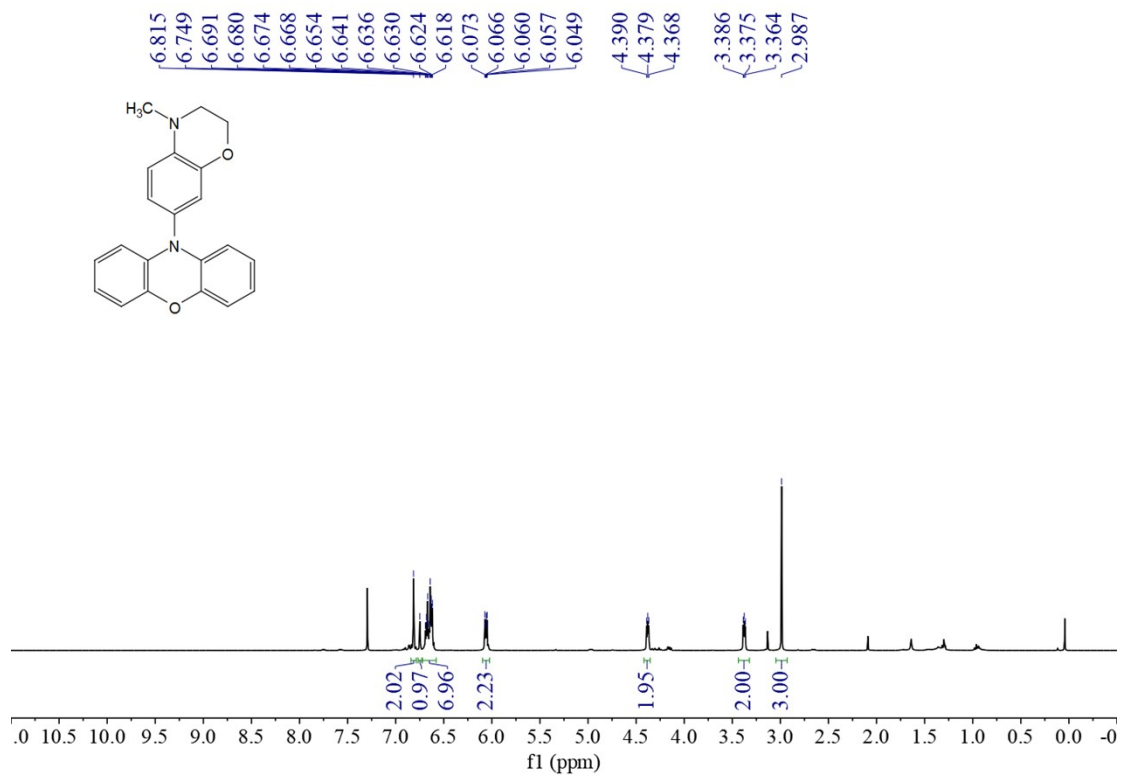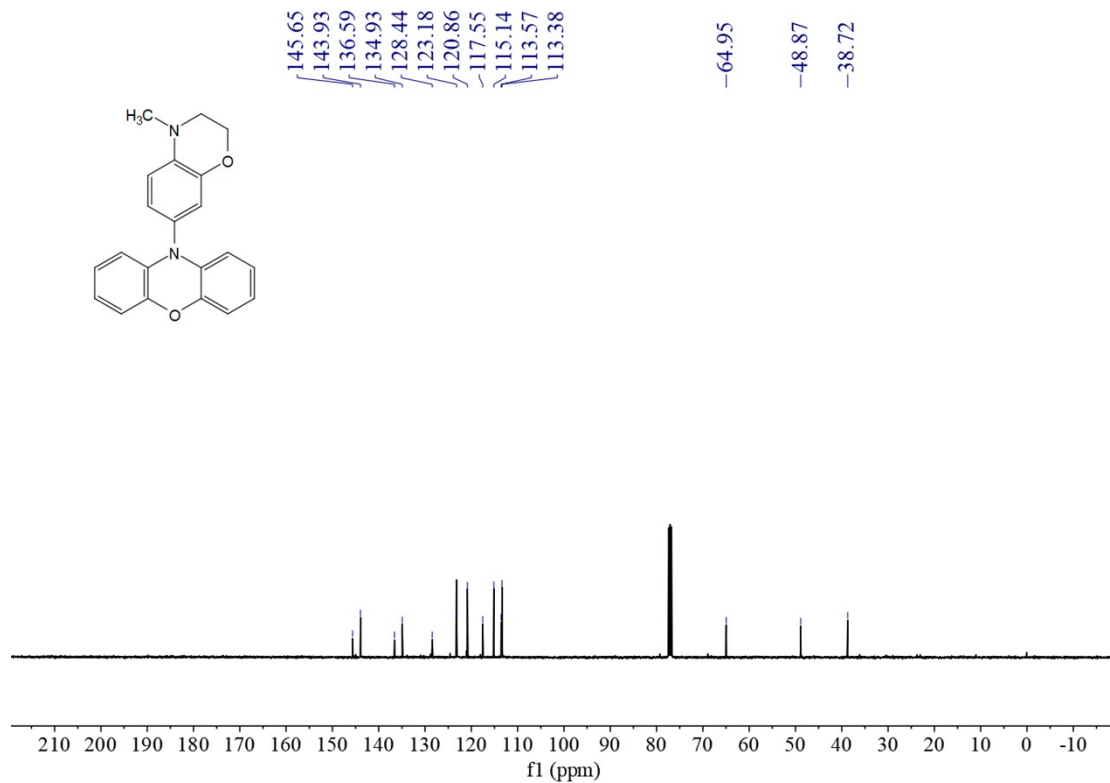



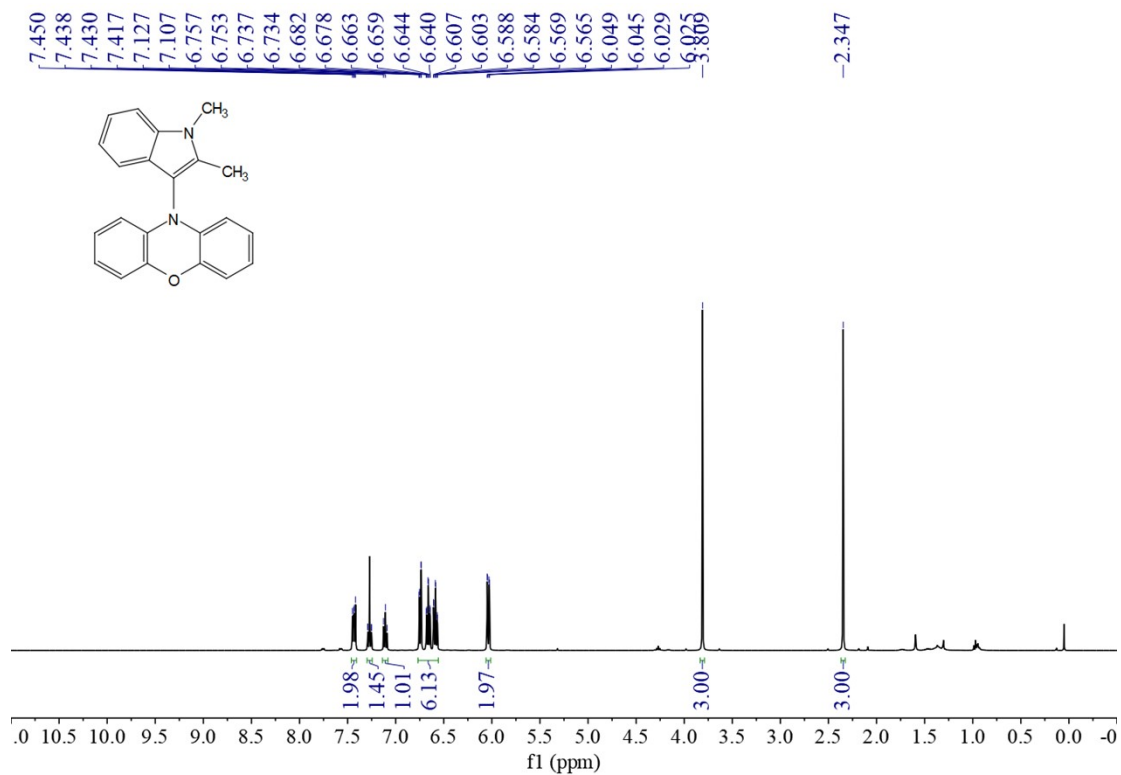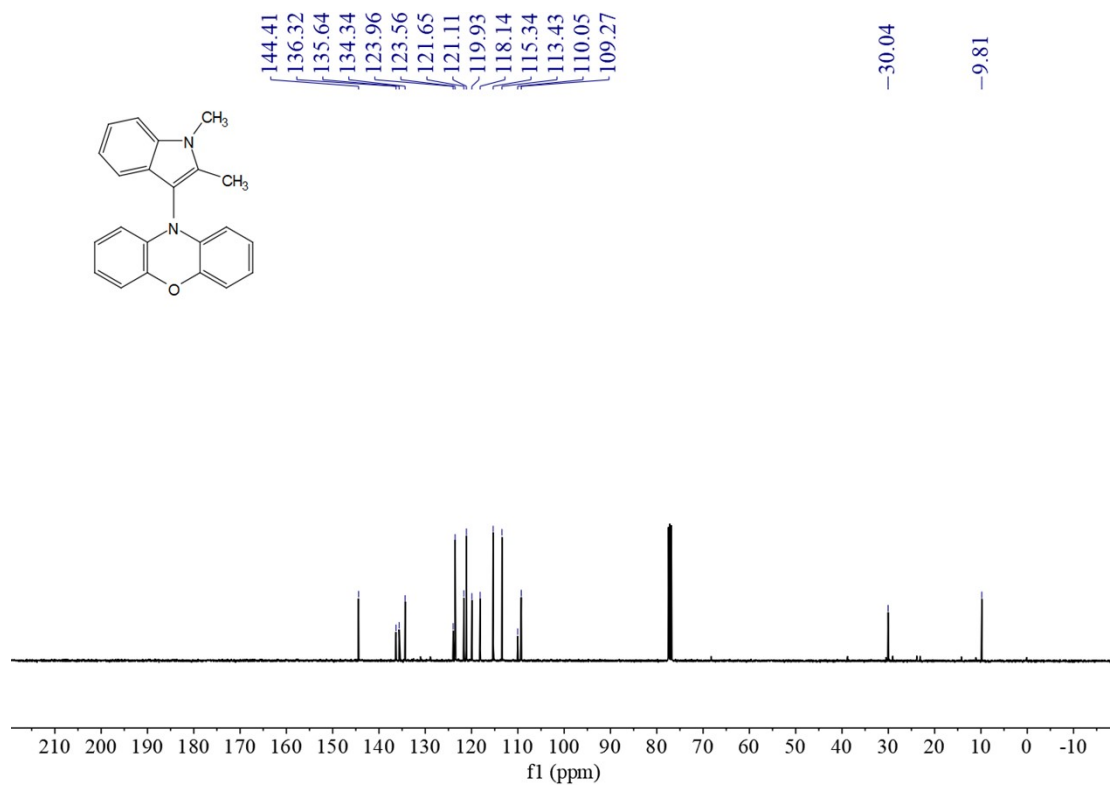

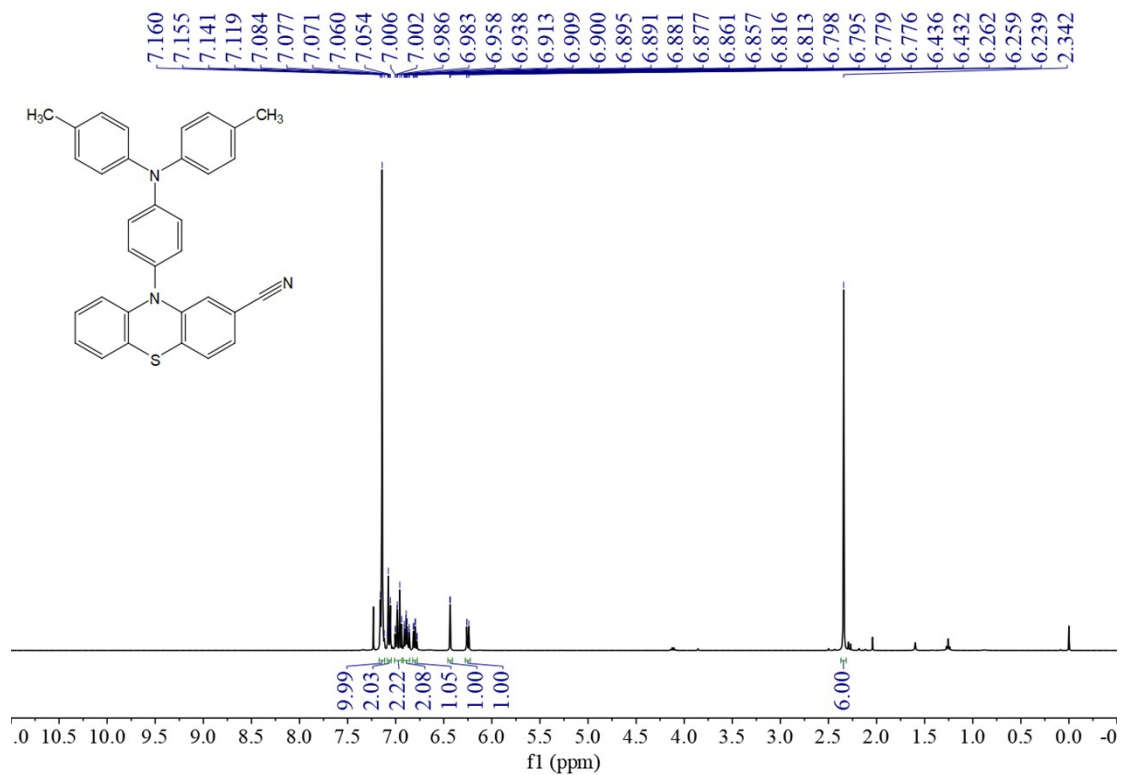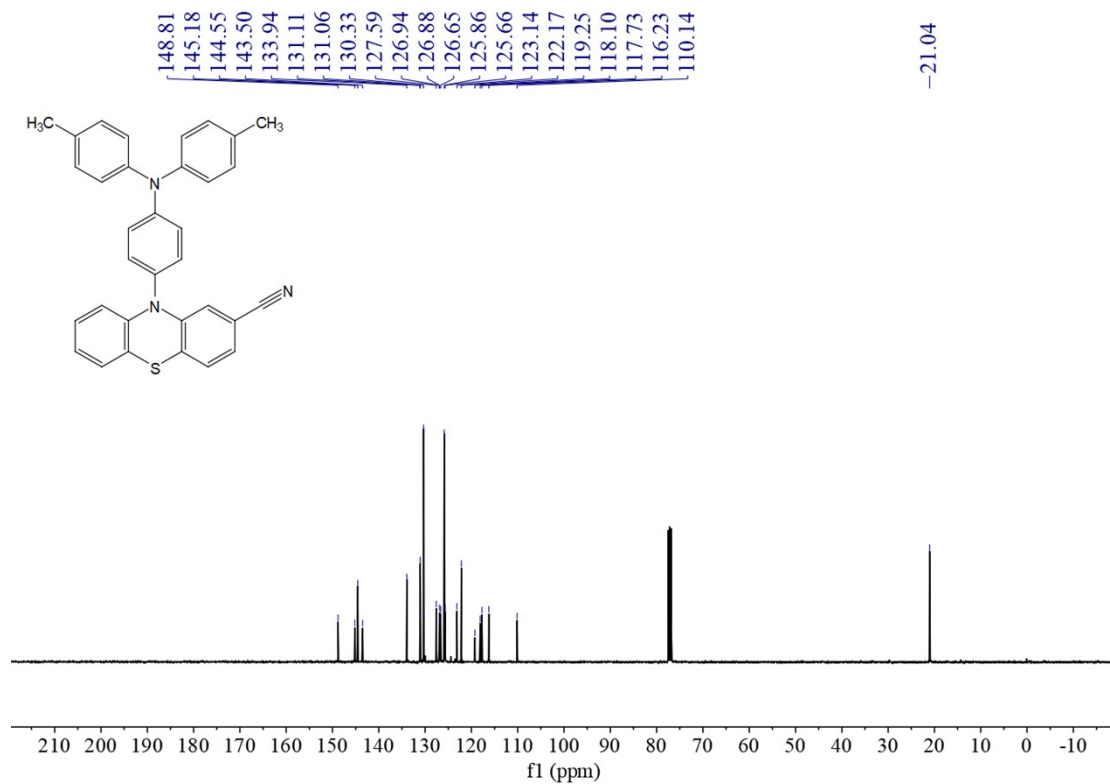

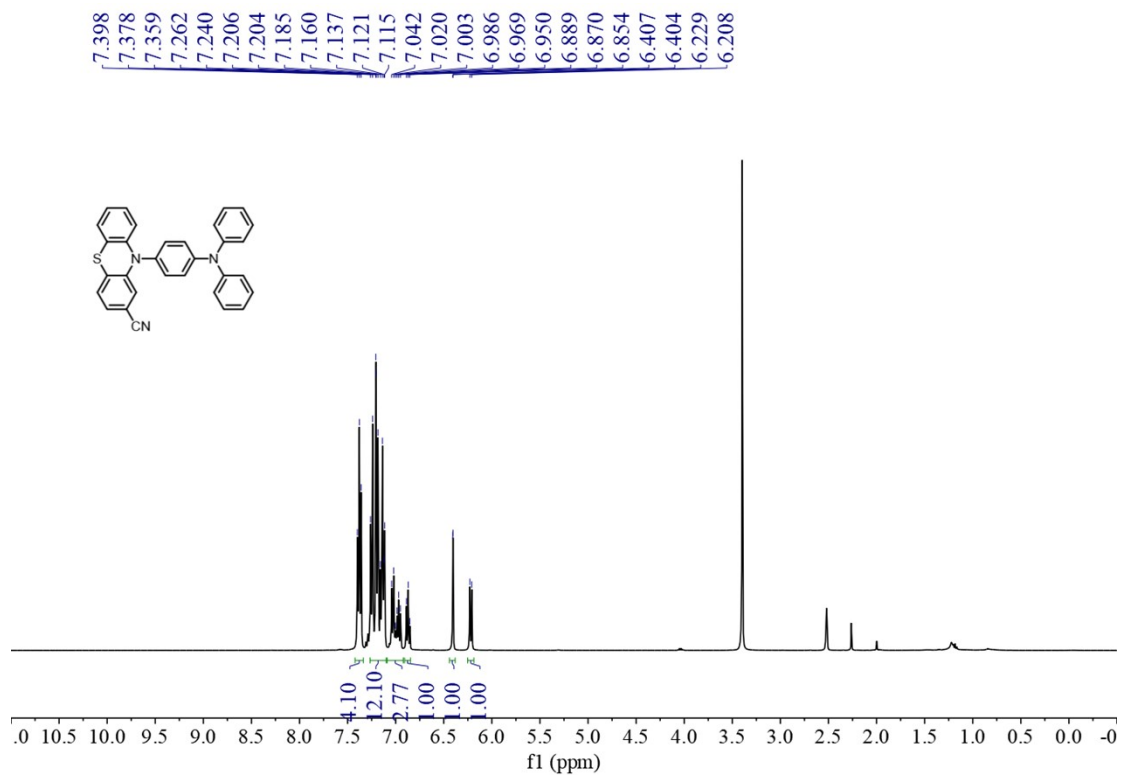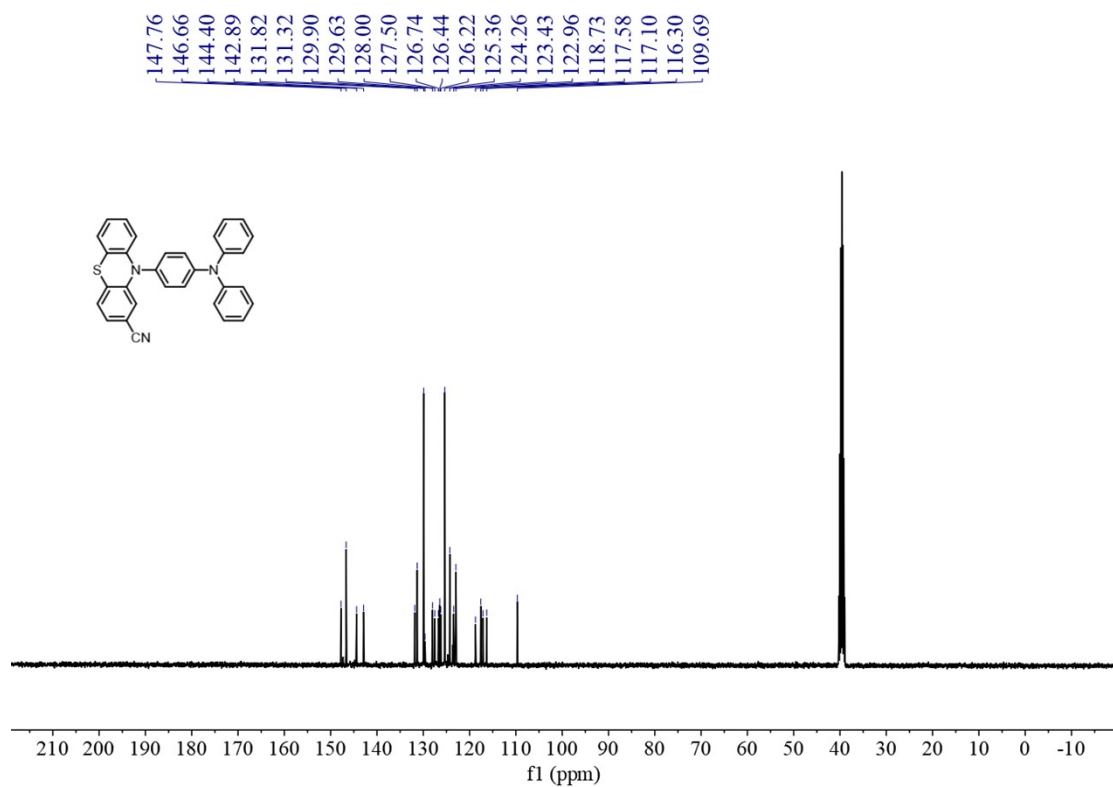

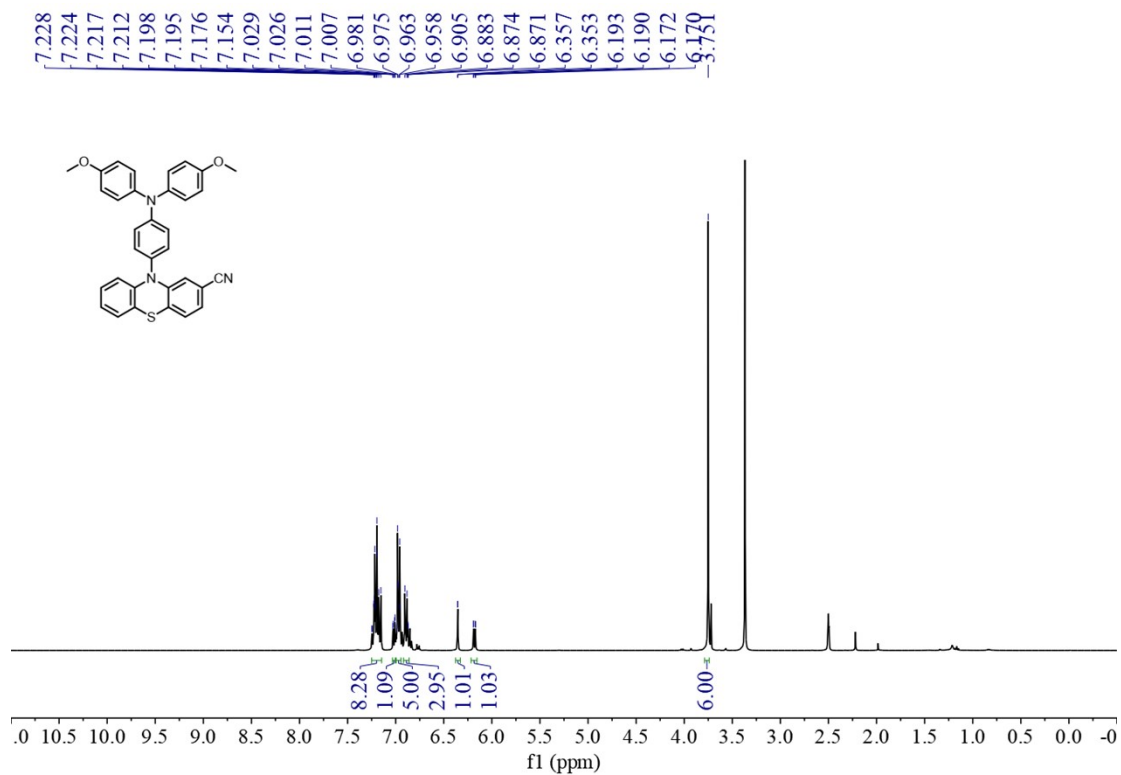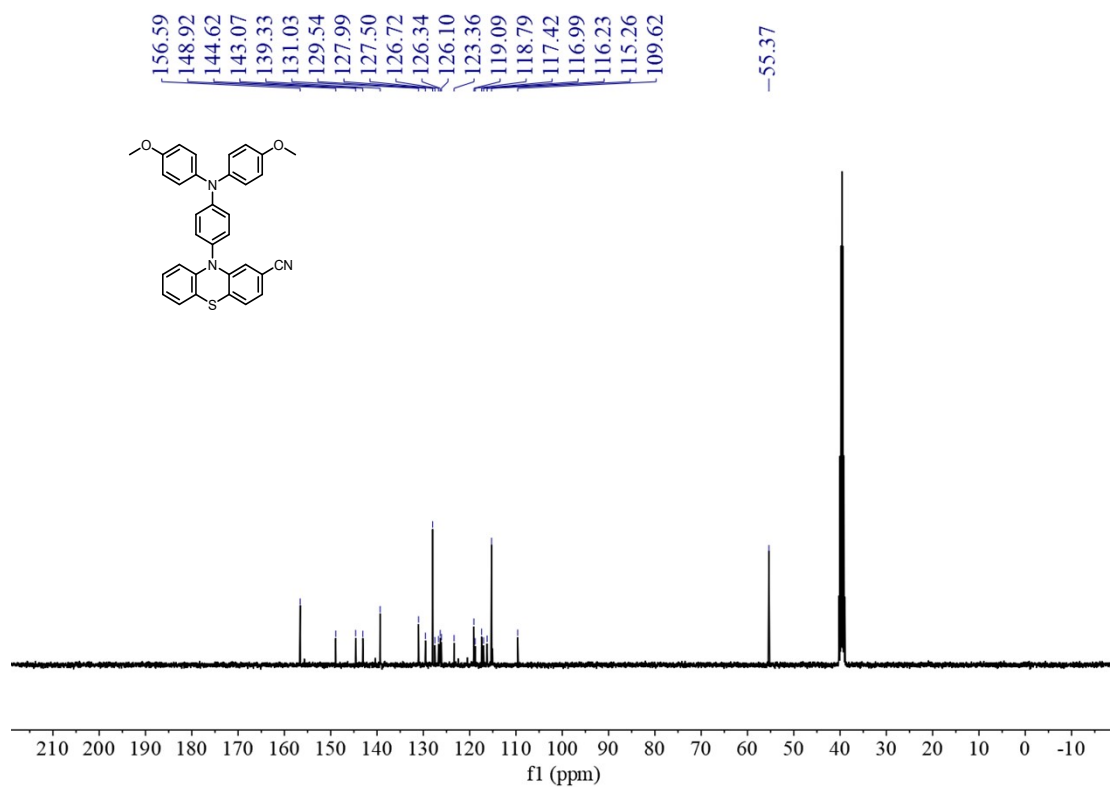

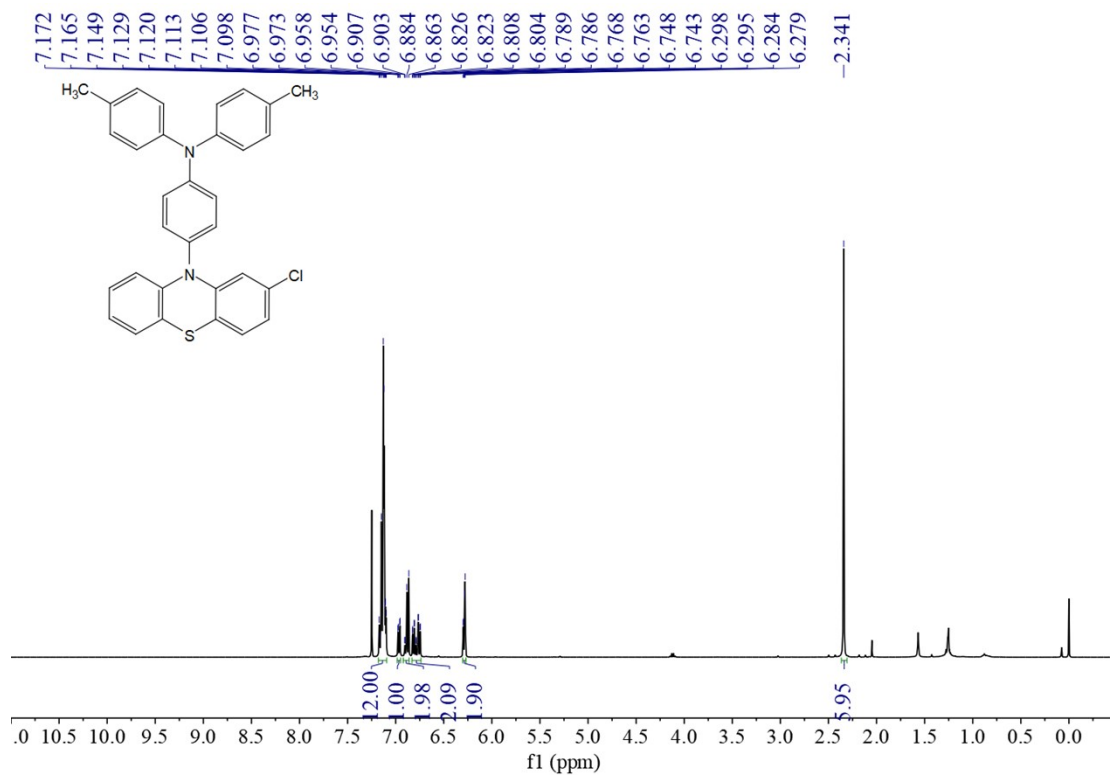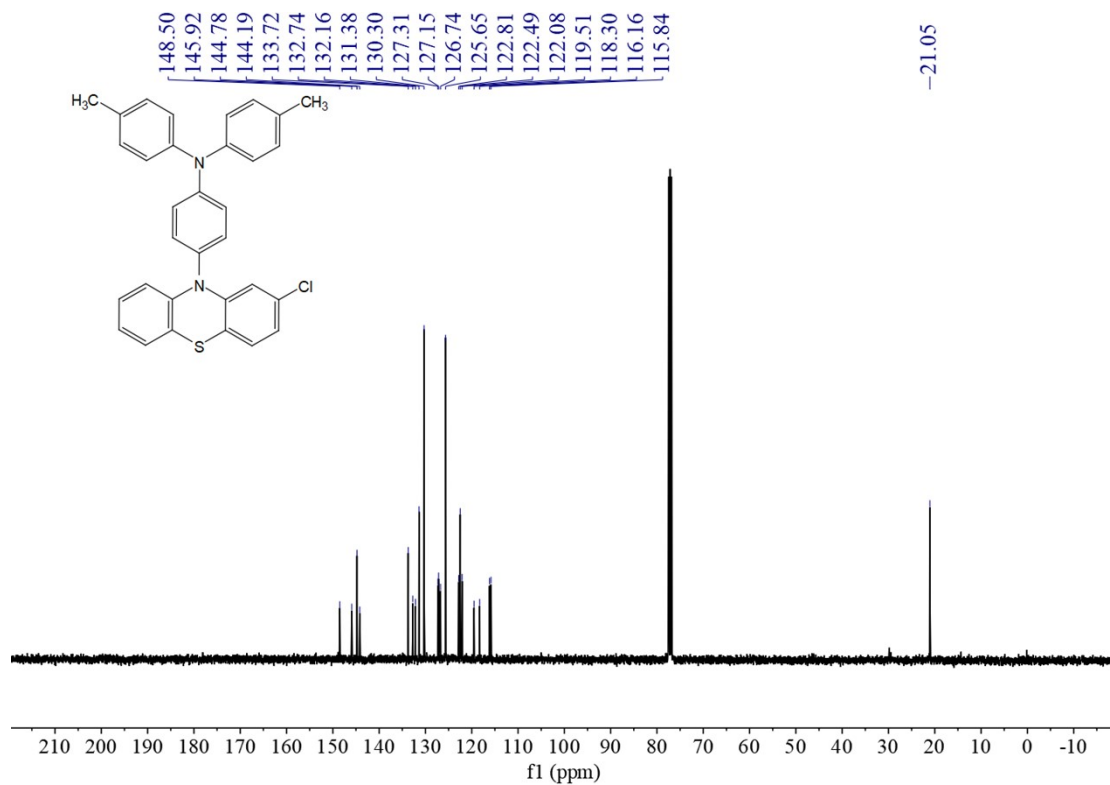

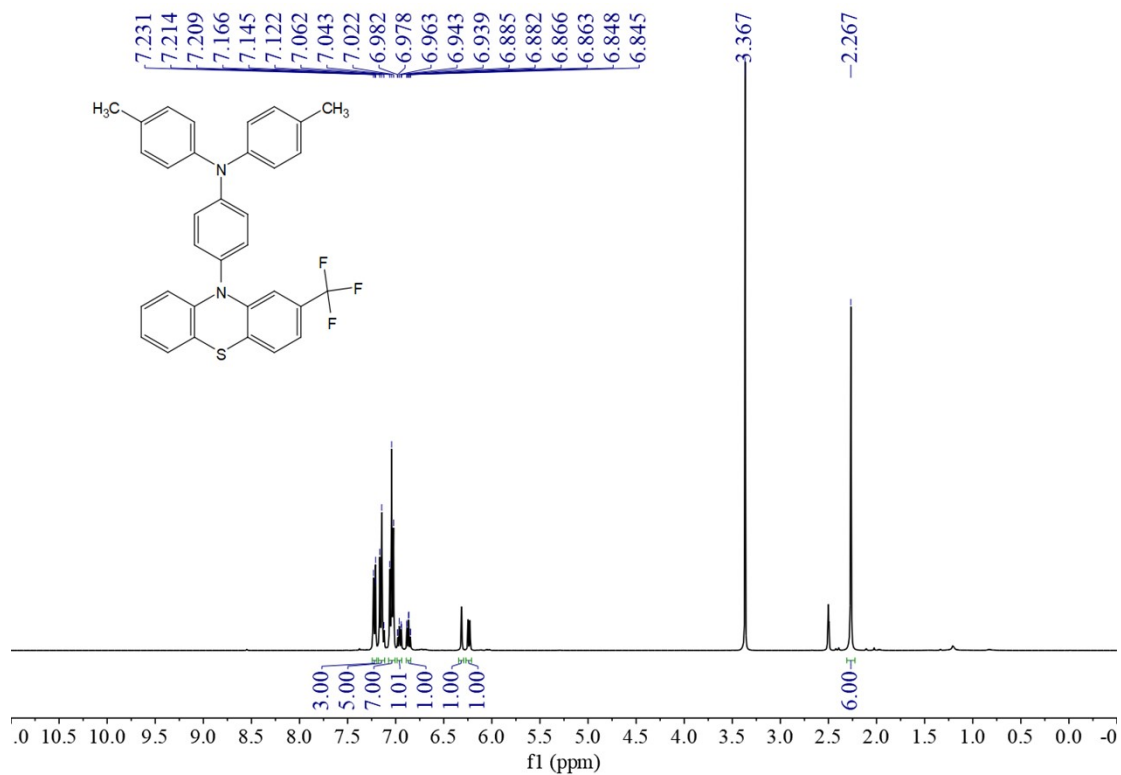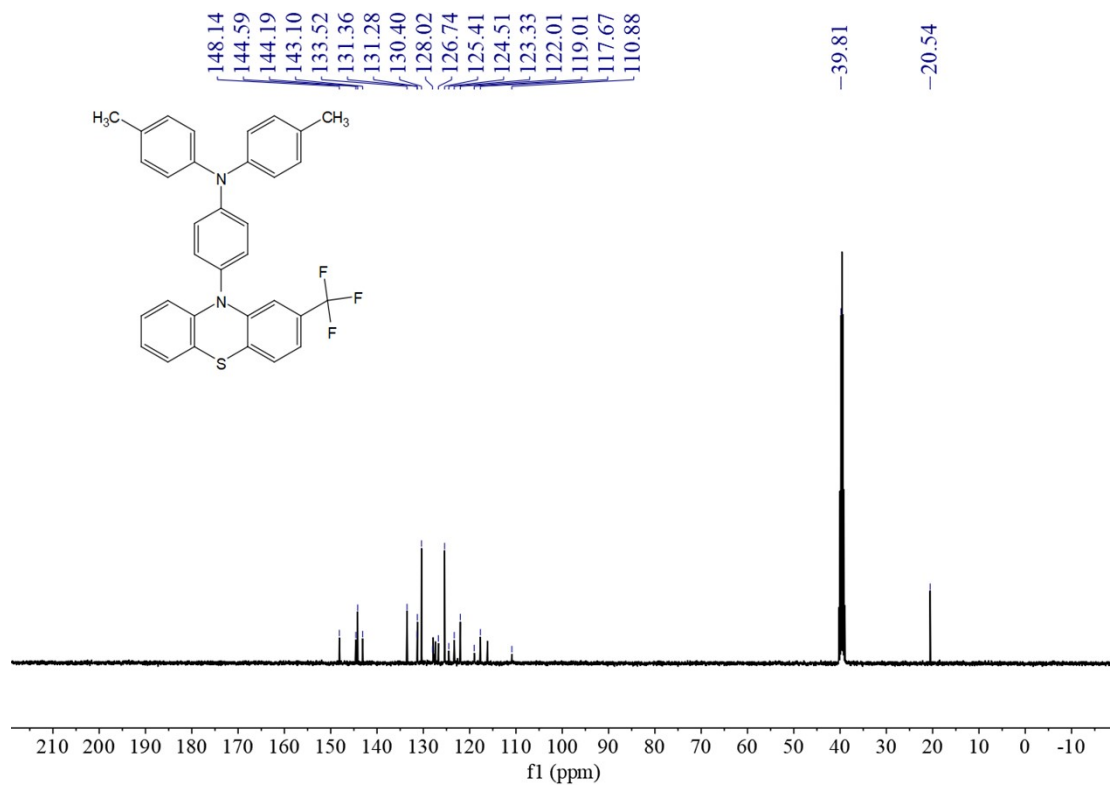

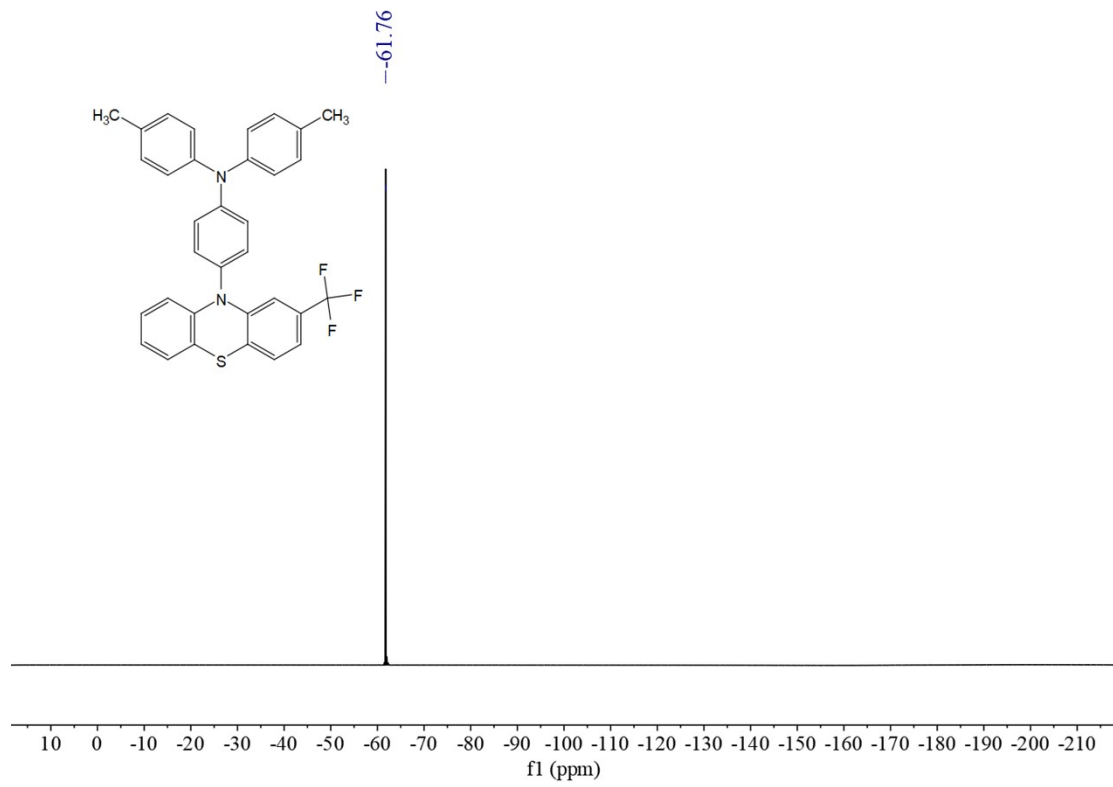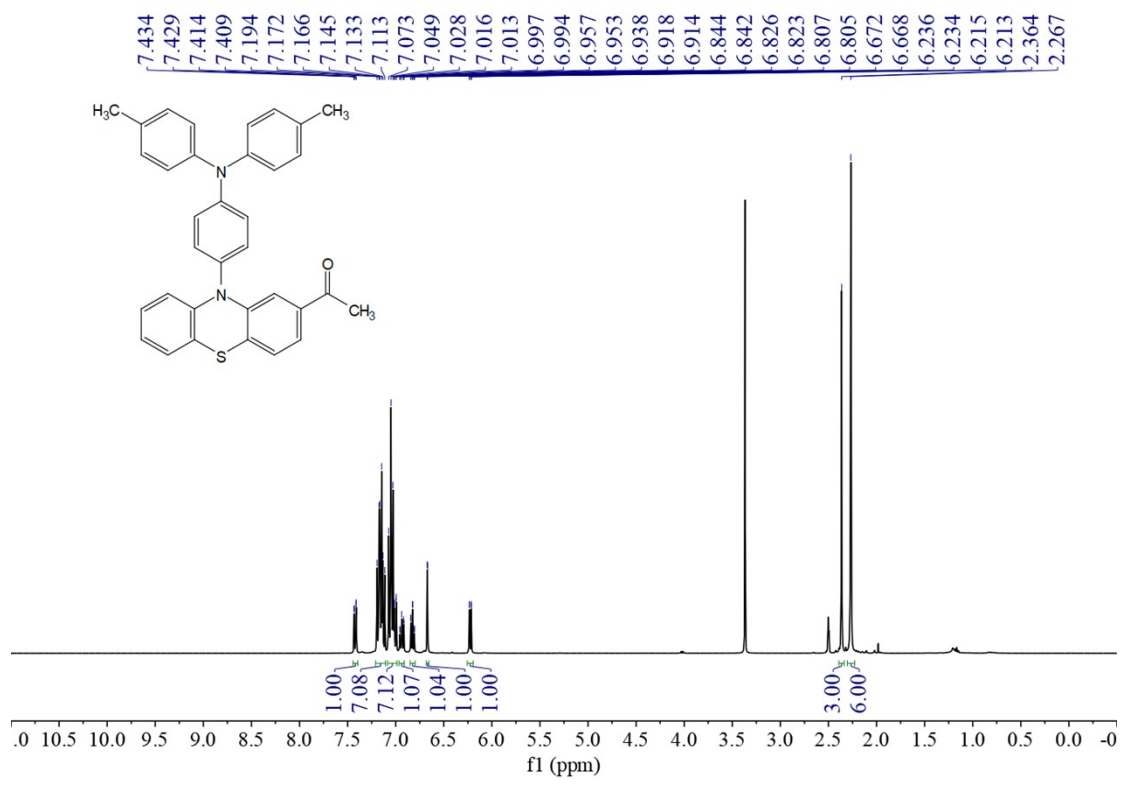

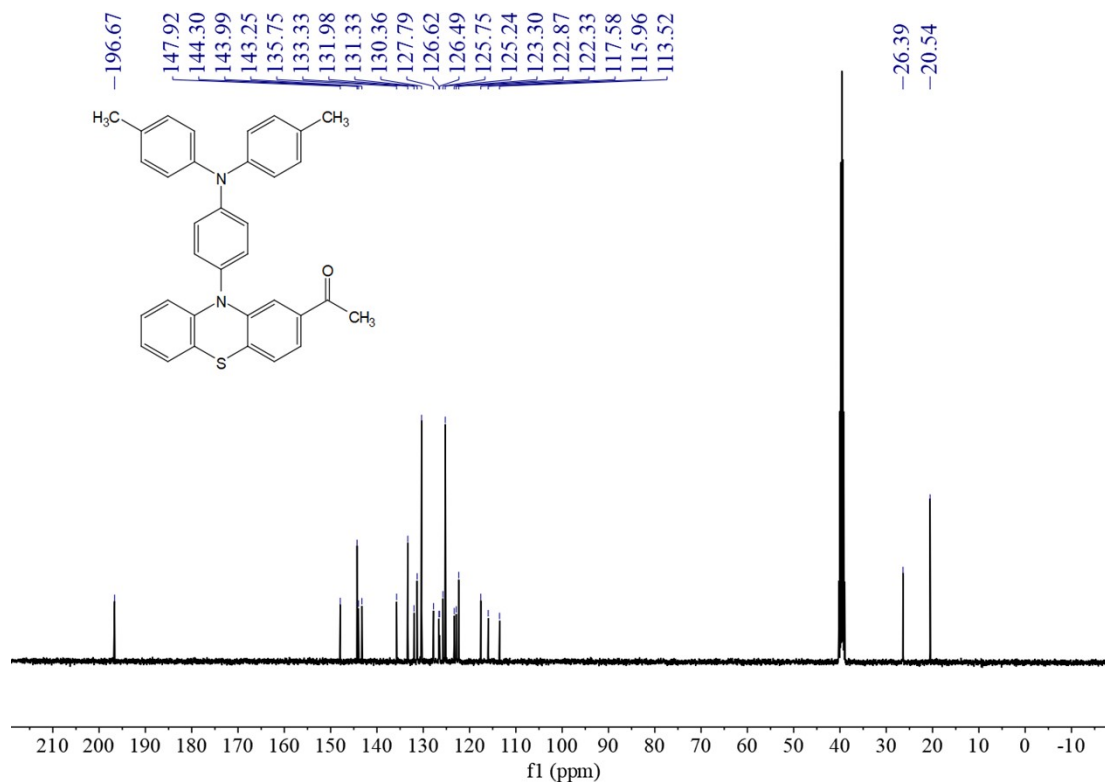

Reference :

- (1) Zhao, Y.; Truhlar, D. G. *Theor. Chem. Acc.*, **2007**, *120*, 215.
- (2) Gaussian 09, Revision D.01, M. J. Frisch, G. W. Trucks, H. B. Schlegel, G. E. Scuseria, M. A. Robb, J. R. Cheeseman, G. Scalmani, V. Barone, B. Mennucci, G. A. Petersson, H. Nakatsuji, M. Caricato, X. Li, H. P. Hratchian, A. F. Izmaylov, J. Bloino, G. Zheng, J. L. Sonnenberg, M. Hada, M. Ehara, K. Toyota, R. Fukuda, J. Hasegawa, M. Ishida, T. Nakajima, Y. Honda, O. Kitao, H. Nakai, T. Vreven, J. A. Montgomery, Jr., J. E. Peralta, F. Ogliaro, M. Bearpark, J. J. Heyd, E. Brothers, K. N. Kudin, V. N. Staroverov, T. Keith, R. Kobayashi, J. Normand, K. Raghavachari, A. Rendell, J. C. Burant, S. S. Iyengar, J. Tomasi, M. Cossi, N. Rega, J. M. Millam, M. Klene, J. E. Knox, J. B. Cross, V. Bakken, C. Adamo, J. Jaramillo, R. Gomperts, R. E. Stratmann, O. Yazyev, A. J. Austin, R. Cammi, C. Pomelli, J. W. Ochterski, R. L. Martin, K. Morokuma, V. G. Zakrzewski, G. A. Voth, P. Salvador, J. J. Dannenberg, S. Dapprich, A. D. Daniels, O. Farkas, J. B.



Foresman, J. V. Ortiz, J. Cioslowski, and D. J. Fox, Gaussian, Inc., Wallingford CT, 2013.

(3) Marenich, A. V.; Cramer, C. J.; Truhlar, D. G. *J. Phys. Chem., B* **2009**, *113*, 6378.

(4) Grimme, S.; Antony, J.; Ehrlich, S. Krieg, H. *J. Chem. Phys.* **2010**, *132*, 154104.

(5) Savéant, J. M. *Acc. Chem. Res.* **1993**, *26*, 455.

(6) Savéant, J. M. *J. Am. Chem. Soc.* **1987**, *109*, 6788.

(7) Marcus, R. A. *J. Chem. Phys.* **1956**, *24*, 966.

(8) Marcus, R. A. *Annu. Rev. Phys. Chem.* **1964**, *15*, 155.

(9) Hush, N. S. *Trans. Faraday Soc.* **1961**, *57*, 557.

(10) K. Liu, S. Tang, T. Wu, S. Wang, M. Zou, H. Cong and A. Lei, *Nat. Commun.*, **2019**, *10*, 639.

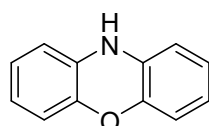

|                                              |             |             |             |
|----------------------------------------------|-------------|-------------|-------------|
| Thermal correction to Gibbs Free Energy=     |             |             | 0.147268    |
| Sum of electronic and thermal Free Energies= |             |             | -592.291781 |
| C                                            | 0.64371100  | 0.25099900  | 3.58213300  |
| C                                            | 1.37807100  | 0.06398200  | 2.41010200  |
| C                                            | 0.72568800  | -0.14283600 | 1.19688700  |
| C                                            | -0.67655200 | -0.14506400 | 1.17477700  |
| C                                            | -1.40864800 | 0.05382500  | 2.33251700  |
| C                                            | -0.74675500 | 0.24596600  | 3.54810200  |
| C                                            | -0.67655200 | -0.14506400 | -1.17477700 |
| C                                            | 0.72568800  | -0.14283600 | -1.19688700 |
| C                                            | 1.37807100  | 0.06398200  | -2.41010200 |
| H                                            | 2.46450700  | 0.07011000  | -2.42617200 |
| C                                            | 0.64371100  | 0.25099900  | -3.58213300 |
| C                                            | -0.74675500 | 0.24596600  | -3.54810200 |
| C                                            | -1.40864800 | 0.05382500  | -2.33251700 |
| H                                            | 1.16848200  | 0.40278700  | 4.51992800  |
| H                                            | 2.46450700  | 0.07011000  | 2.42617200  |
| H                                            | -2.49233000 | 0.04891700  | 2.26974400  |
| H                                            | -1.32189800 | 0.39253700  | 4.45617800  |
| H                                            | 1.16848200  | 0.40278700  | -4.51992800 |
| H                                            | -1.32189800 | 0.39253700  | -4.45617800 |
| H                                            | -2.49233000 | 0.04891700  | -2.26974400 |
| N                                            | 1.41112600  | -0.36767900 | 0.00000000  |
| H                                            | 2.39936400  | -0.13816300 | 0.00000000  |

|   |             |             |            |
|---|-------------|-------------|------------|
| O | -1.36261900 | -0.37990600 | 0.00000000 |
|---|-------------|-------------|------------|

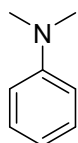

|                                              |             |             |             |
|----------------------------------------------|-------------|-------------|-------------|
| Thermal correction to Gibbs Free Energy=     |             |             | 0.142546    |
| Sum of electronic and thermal Free Energies= |             |             | -365.908102 |
| C                                            | -0.54338600 | -1.20730500 | -0.03552000 |
| C                                            | 0.18724200  | -0.00030200 | -0.08984200 |
| C                                            | -0.54503200 | 1.20641900  | -0.05113900 |
| C                                            | -1.93435600 | 1.19600800  | 0.01280700  |
| C                                            | -2.64714400 | -0.00108200 | 0.05056100  |
| C                                            | -1.93285400 | -1.19752500 | 0.02876500  |
| H                                            | -0.02801200 | -2.16024100 | -0.03955500 |
| H                                            | -0.03010500 | 2.15949200  | -0.07125900 |
| H                                            | -2.46323000 | 2.14489800  | 0.03833600  |
| H                                            | -3.73094200 | -0.00147100 | 0.10336000  |
| H                                            | -2.46045400 | -2.14664300 | 0.06869800  |
| N                                            | 1.56933700  | 0.00208200  | -0.18925200 |
| C                                            | 2.27647300  | 1.23931500  | 0.09030100  |
| H                                            | 2.06300700  | 1.62957700  | 1.09676200  |
| H                                            | 3.34883800  | 1.05785600  | 0.00966800  |
| H                                            | 2.01386200  | 2.01254800  | -0.63830600 |
| C                                            | 2.28174400  | -1.23765900 | 0.06151100  |
| H                                            | 1.98715900  | -2.00688200 | -0.65862700 |
| H                                            | 3.35063300  | -1.06035300 | -0.06377200 |
| H                                            | 2.10775900  | -1.63058200 | 1.07480300  |

K<sub>2</sub>S<sub>2</sub>O<sub>8</sub>

|                                              |             |             |              |
|----------------------------------------------|-------------|-------------|--------------|
| Thermal correction to Gibbs Free Energy=     |             |             | -0.006197    |
| Sum of electronic and thermal Free Energies= |             |             | -2597.653138 |
| O                                            | 0.31102800  | 0.98836500  | 0.15674100   |
| O                                            | -0.73846900 | 0.71195100  | -0.76919800  |
| S                                            | -2.22769300 | 0.99401100  | 0.01379800   |
| O                                            | -2.13627400 | 0.22069200  | 1.25553600   |
| O                                            | -2.33295800 | 2.43446100  | 0.16007300   |
| O                                            | -3.06755400 | 0.35723200  | -1.00898600  |
| S                                            | 1.26920800  | -0.38116400 | 0.22689600   |
| O                                            | 1.92955500  | -0.46298800 | -1.08338400  |
| O                                            | 2.18601200  | 0.02843700  | 1.29666000   |
| O                                            | 0.37482500  | -1.49678300 | 0.52743200   |
| K                                            | -2.04945200 | -2.08659200 | -0.15053700  |
| K                                            | 4.31926400  | 0.39940800  | -0.27736300  |

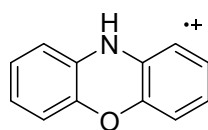

|                                              |             |             |             |
|----------------------------------------------|-------------|-------------|-------------|
| Thermal correction to Gibbs Free Energy=     |             |             | 0.147955    |
| Sum of electronic and thermal Free Energies= |             |             | -592.116758 |
| C                                            | -0.66895800 | 0.00001700  | 3.59426600  |
| C                                            | -1.39940400 | -0.00001600 | 2.42617100  |
| C                                            | -0.71933400 | -0.00001700 | 1.19536400  |
| C                                            | 0.69230800  | -0.00001700 | 1.17400800  |
| C                                            | 1.42431300  | -0.00000900 | 2.35823100  |
| C                                            | 0.74038100  | 0.00001000  | 3.56109800  |
| C                                            | 0.69230800  | -0.00001700 | -1.17400800 |
| C                                            | -0.71933400 | -0.00001700 | -1.19536400 |
| C                                            | -1.39940400 | -0.00001600 | -2.42617100 |
| H                                            | -2.48483600 | -0.00005500 | -2.42634100 |
| C                                            | -0.66895800 | 0.00001700  | -3.59426600 |
| C                                            | 0.74038100  | 0.00001000  | -3.56109800 |
| C                                            | 1.42431300  | -0.00000900 | -2.35823100 |
| H                                            | -1.18348300 | 0.00003300  | 4.54855400  |
| H                                            | -2.48483600 | -0.00005500 | 2.42634100  |
| H                                            | 2.50757400  | -0.00001800 | 2.30917600  |
| H                                            | 1.29857300  | 0.00004200  | 4.49073000  |
| H                                            | -1.18348300 | 0.00003300  | -4.54855400 |
| H                                            | 1.29857300  | 0.00004200  | -4.49073000 |
| H                                            | 2.50757400  | -0.00001800 | -2.30917600 |
| N                                            | -1.38026400 | -0.00001100 | 0.00000000  |
| H                                            | -2.40119000 | 0.00027000  | 0.00000000  |
| O                                            | 1.36946300  | 0.00002500  | 0.00000000  |

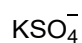

|                                              |             |             |              |
|----------------------------------------------|-------------|-------------|--------------|
| Thermal correction to Gibbs Free Energy=     |             |             | -0.015101    |
| Sum of electronic and thermal Free Energies= |             |             | -1298.996802 |
| O                                            | 0.01025900  | -0.01452700 | 1.21704800   |
| S                                            | -0.90006700 | 0.00002700  | 0.00012300   |
| O                                            | -1.76031500 | -1.21630400 | -0.00077700  |
| O                                            | -1.72114100 | 1.24388500  | 0.00056400   |
| O                                            | 0.00986800  | -0.01317600 | -1.21678600  |
| K                                            | 2.21535300  | 0.00002900  | -0.00012400  |

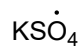

|                                          |  |  |           |
|------------------------------------------|--|--|-----------|
| Thermal correction to Gibbs Free Energy= |  |  | -0.017030 |
|------------------------------------------|--|--|-----------|

|                                              |             |             |              |
|----------------------------------------------|-------------|-------------|--------------|
| Sum of electronic and thermal Free Energies= |             |             | -1298.800332 |
| O                                            | -0.29437800 | 0.82918000  | 1.07807700   |
| S                                            | -0.92132700 | -0.06617400 | -0.00040400  |
| O                                            | -2.37068500 | -0.09447700 | 0.02667100   |
| O                                            | -0.33241400 | 0.84084600  | -1.09086100  |
| O                                            | -0.24428600 | -1.36988500 | -0.01896100  |
| K                                            | 2.14080700  | -0.03087000 | 0.00247700   |

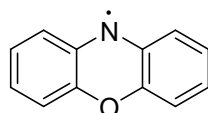

|                                              |             |             |             |
|----------------------------------------------|-------------|-------------|-------------|
| Thermal correction to Gibbs Free Energy=     |             |             | 0.135013    |
| Sum of electronic and thermal Free Energies= |             |             | -591.676992 |
| C                                            | 3.58444100  | -0.69287600 | 0.00000000  |
| C                                            | 2.40252700  | -1.40688800 | 0.00000000  |
| C                                            | 1.15282500  | -0.74442600 | 0.00000000  |
| C                                            | 1.16800700  | 0.67190600  | 0.00000000  |
| C                                            | 2.35455200  | 1.39657900  | 0.00000000  |
| C                                            | 3.56270900  | 0.71199900  | 0.00000000  |
| C                                            | -1.16800700 | 0.67190600  | 0.00000000  |
| C                                            | -1.15282500 | -0.74442600 | 0.00000000  |
| C                                            | -2.40252700 | -1.40688800 | 0.00000000  |
| H                                            | -2.39328600 | -2.49252300 | 0.00000000  |
| C                                            | -3.58444100 | -0.69287600 | 0.00000000  |
| C                                            | -3.56270900 | 0.71199900  | 0.00000000  |
| C                                            | -2.35455200 | 1.39657900  | 0.00000000  |
| H                                            | 4.53428800  | -1.21730800 | 0.00000000  |
| H                                            | 2.39328600  | -2.49252300 | 0.00000000  |
| H                                            | 2.31053700  | 2.48081200  | 0.00000000  |
| H                                            | 4.49326000  | 1.26972100  | 0.00000000  |
| H                                            | -4.53428800 | -1.21730800 | 0.00000000  |
| H                                            | -4.49326000 | 1.26972100  | 0.00000000  |
| H                                            | -2.31053700 | 2.48081200  | 0.00000000  |
| N                                            | 0.00000000  | -1.47116100 | 0.00000000  |
| O                                            | 0.00000000  | 1.37264800  | 0.00000000  |

KHSO<sub>4</sub>

|                                              |             |             |              |
|----------------------------------------------|-------------|-------------|--------------|
| Thermal correction to Gibbs Free Energy=     |             |             | -0.004443    |
| Sum of electronic and thermal Free Energies= |             |             | -1299.465344 |
| O                                            | -0.00794100 | 0.11693100  | -1.22219600  |
| S                                            | -0.84925200 | 0.12494800  | -0.01077700  |
| O                                            | -1.94059100 | 1.09331300  | 0.00426700   |
| O                                            | -1.54605200 | -1.34807800 | -0.07753900  |
| O                                            | -0.01762700 | 0.12120100  | 1.21387300   |

|   |             |             |            |
|---|-------------|-------------|------------|
| K | 2.31073600  | -0.02460700 | 0.01028200 |
| H | -2.21827400 | -1.39858600 | 0.62982800 |

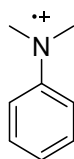

|                                              |             |             |             |
|----------------------------------------------|-------------|-------------|-------------|
| Thermal correction to Gibbs Free Energy=     |             |             | 0.143025    |
| Sum of electronic and thermal Free Energies= |             |             | -365.724450 |
| C                                            | -0.54416900 | -1.23198200 | 0.01623600  |
| C                                            | 0.18027000  | -0.00000100 | -0.00007100 |
| C                                            | -0.54418100 | 1.23198200  | -0.01639800 |
| C                                            | -1.92011300 | 1.21723000  | -0.01742600 |
| C                                            | -2.61856700 | -0.00000200 | 0.00009000  |
| C                                            | -1.92010600 | -1.21722700 | 0.01744400  |
| H                                            | -0.01582400 | -2.17637900 | 0.03639000  |
| H                                            | -0.01581300 | 2.17636300  | -0.03674700 |
| H                                            | -2.46543600 | 2.15420600  | -0.03333200 |
| H                                            | -3.70329300 | -0.00000800 | 0.00020900  |
| H                                            | -2.46542200 | -2.15420700 | 0.03333500  |
| N                                            | 1.52966700  | 0.00000500  | 0.00001700  |
| C                                            | 2.27957100  | 1.25569600  | 0.03220600  |
| H                                            | 1.99043600  | 1.83634300  | 0.91160200  |
| H                                            | 3.34116200  | 1.02909800  | 0.08052200  |
| H                                            | 2.07065800  | 1.83395700  | -0.87225300 |
| C                                            | 2.27956700  | -1.25569700 | -0.03212200 |
| H                                            | 1.99052300  | -1.83632400 | -0.91156200 |
| H                                            | 3.34116300  | -1.02910200 | -0.08033900 |
| H                                            | 2.07055100  | -1.83396900 | 0.87230600  |

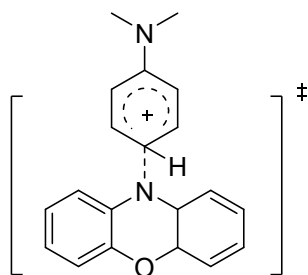

|                                              |             |             |             |
|----------------------------------------------|-------------|-------------|-------------|
| Thermal correction to Gibbs Free Energy=     |             |             | 0.304671    |
| Sum of electronic and thermal Free Energies= |             |             | -957.390613 |
| C                                            | -2.00517400 | -1.07561700 | 2.00329800  |
| C                                            | -0.98182900 | -0.14744700 | 2.01494600  |
| C                                            | 0.12558600  | -0.28690000 | 1.14474300  |
| C                                            | 0.15696500  | -1.41343500 | 0.28096300  |
| C                                            | -0.88851100 | -2.32964000 | 0.24366100  |

|   |             |             |             |
|---|-------------|-------------|-------------|
| C | -1.97329700 | -2.14304500 | 1.09182900  |
| C | 2.35446500  | -0.88808700 | -0.29677500 |
| C | 2.30207100  | 0.25004300  | 0.51842100  |
| C | 3.47445600  | 0.99310400  | 0.71177600  |
| H | 3.42404900  | 1.87615300  | 1.34195400  |
| C | 4.65750300  | 0.60011400  | 0.10635000  |
| C | 4.68418000  | -0.53971100 | -0.70821800 |
| C | 3.53421400  | -1.29139400 | -0.91255800 |
| H | -2.84360300 | -0.96904800 | 2.68306500  |
| H | -0.98646300 | 0.69731700  | 2.69586300  |
| H | -0.83121400 | -3.17169900 | -0.43780700 |
| H | -2.79197100 | -2.85585000 | 1.06780400  |
| H | 5.56314100  | 1.17630000  | 0.26227400  |
| H | 5.61060600  | -0.84452800 | -1.18367800 |
| H | 3.53129900  | -2.17925600 | -1.53602800 |
| N | 1.10398900  | 0.67263100  | 1.11429200  |
| O | 1.23304300  | -1.64091400 | -0.50696100 |
| C | 0.29820800  | 1.34064200  | -1.37484300 |
| C | -0.72968400 | 2.58694400  | 0.45931200  |
| C | -0.87682400 | 0.70185100  | -1.62456600 |
| H | 1.15424600  | 1.16497400  | -2.01940300 |
| C | -1.92214000 | 1.98140600  | 0.22047600  |
| H | -0.65836000 | 3.36239800  | 1.21522200  |
| C | -2.01077300 | 0.91421300  | -0.75394000 |
| H | -0.96627300 | 0.04062100  | -2.47714700 |
| H | -2.80746100 | 2.29430500  | 0.75907500  |
| N | -3.09983700 | 0.16126100  | -0.85172800 |
| C | -3.22550200 | -0.84447700 | -1.90900700 |
| H | -2.34431500 | -1.48827100 | -1.92731000 |
| H | -4.10082300 | -1.45738700 | -1.70201800 |
| H | -3.34536800 | -0.36165900 | -2.88402500 |
| C | -4.28499600 | 0.42568600  | -0.03240700 |
| H | -4.83252300 | 1.28983000  | -0.42275800 |
| H | -4.92903000 | -0.45147900 | -0.06268000 |
| H | -4.00010600 | 0.61118500  | 1.00301900  |
| C | 0.46012500  | 2.13825300  | -0.19647700 |
| H | 1.36651100  | 2.72114200  | -0.07957800 |

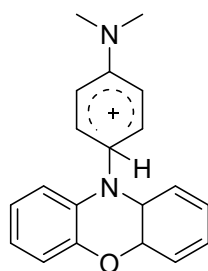

|                                              |             |             |             |
|----------------------------------------------|-------------|-------------|-------------|
| Thermal correction to Gibbs Free Energy=     |             |             | 0.304998    |
| Sum of electronic and thermal Free Energies= |             |             | -957.414123 |
| C                                            | -0.21241200 | 3.33607900  | 0.64809600  |
| C                                            | 0.03651000  | 1.98327200  | 0.40220000  |
| C                                            | -0.99821500 | 1.13928700  | 0.00028000  |
| C                                            | -2.28905400 | 1.67688700  | -0.11745000 |
| C                                            | -2.54410800 | 3.01037700  | 0.14655300  |
| C                                            | -1.49518100 | 3.85327000  | 0.52085600  |
| C                                            | -3.22237300 | -0.45925100 | -0.23847800 |
| C                                            | -1.95616700 | -1.05528600 | -0.12466900 |
| C                                            | -1.89302600 | -2.42056600 | 0.15562200  |
| H                                            | -0.93619100 | -2.91402300 | 0.28454300  |
| C                                            | -3.06543600 | -3.17143500 | 0.27729300  |
| C                                            | -4.30929100 | -2.56734600 | 0.14973600  |
| C                                            | -4.38489300 | -1.19501000 | -0.09784700 |
| H                                            | 0.61060800  | 3.97666000  | 0.94742600  |
| H                                            | 1.04101300  | 1.59580300  | 0.52704500  |
| H                                            | -3.56069500 | 3.37549900  | 0.04172300  |
| H                                            | -1.69018600 | 4.90254900  | 0.71485000  |
| H                                            | -2.99003400 | -4.23421900 | 0.48260400  |
| H                                            | -5.21985600 | -3.14874300 | 0.24715300  |
| H                                            | -5.33708600 | -0.68440900 | -0.19967800 |
| N                                            | -0.83317300 | -0.22451000 | -0.31310600 |
| O                                            | -3.33250000 | 0.88135600  | -0.53708700 |
| C                                            | 1.35193400  | -0.11778900 | -1.42263400 |
| C                                            | 1.18695100  | -1.00690000 | 0.90797800  |
| C                                            | 2.68060700  | 0.00502900  | -1.28525000 |
| H                                            | 0.85787700  | 0.21067400  | -2.33291900 |
| C                                            | 2.51488300  | -0.88233200 | 1.05279300  |
| H                                            | 0.56814400  | -1.30378300 | 1.75120500  |
| C                                            | 3.34054400  | -0.44600200 | -0.06672700 |
| H                                            | 3.26757700  | 0.43930200  | -2.08379000 |
| H                                            | 2.97646900  | -1.05983600 | 2.01571200  |
| N                                            | 4.64587000  | -0.42607400 | 0.03008700  |
| C                                            | 5.48183000  | 0.13531900  | -1.04240900 |
| H                                            | 5.18475200  | 1.16531800  | -1.24650500 |
| H                                            | 6.51713200  | 0.12405100  | -0.71143700 |

|   |            |             |             |
|---|------------|-------------|-------------|
| H | 5.38278700 | -0.46773400 | -1.94786000 |
| C | 5.34385500 | -0.93136800 | 1.22108000  |
| H | 4.87831100 | -1.85310500 | 1.56763100  |
| H | 6.37553700 | -1.14055300 | 0.94589000  |
| H | 5.32329700 | -0.17764000 | 2.01312300  |
| C | 0.49383900 | -0.80148400 | -0.40490300 |
| H | 0.35686800 | -1.81106400 | -0.83161800 |

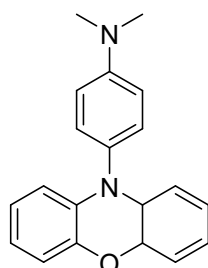

|                                              |             |             |             |
|----------------------------------------------|-------------|-------------|-------------|
| Thermal correction to Gibbs Free Energy=     |             |             | 0.289007    |
| Sum of electronic and thermal Free Energies= |             |             | -957.012035 |
| C                                            | 1.53813800  | 3.64363900  | 0.01564100  |
| C                                            | 0.82062200  | 2.44530600  | 0.00990800  |
| C                                            | 1.48272300  | 1.21647900  | 0.00536000  |
| C                                            | 2.88830800  | 1.22213300  | 0.00770800  |
| C                                            | 3.60021500  | 2.40854400  | 0.01323900  |
| C                                            | 2.92654400  | 3.63260900  | 0.01714800  |
| C                                            | 2.94158800  | -1.14081500 | -0.00316700 |
| C                                            | 1.53706900  | -1.19846000 | -0.00676100 |
| C                                            | 0.93098600  | -2.45578500 | -0.01641000 |
| H                                            | -0.15147700 | -2.51990400 | -0.02003900 |
| C                                            | 1.70181700  | -3.62061300 | -0.02116000 |
| C                                            | 3.08827700  | -3.54710500 | -0.01671000 |
| C                                            | 3.70624200  | -2.29399500 | -0.00799300 |
| H                                            | 0.99549000  | 4.58350300  | 0.01902700  |
| H                                            | -0.26368800 | 2.46068400  | 0.00890900  |
| H                                            | 4.68450200  | 2.35625100  | 0.01474900  |
| H                                            | 3.49070600  | 4.55907800  | 0.02152400  |
| H                                            | 1.20209700  | -4.58398400 | -0.02838800 |
| H                                            | 3.69349400  | -4.44732200 | -0.02012200 |
| H                                            | 4.78710200  | -2.19319500 | -0.00467800 |
| N                                            | 0.80123500  | -0.00698300 | -0.00066000 |
| O                                            | 3.62073900  | 0.05659900  | 0.00548000  |
| C                                            | -0.62679100 | -0.03940400 | -0.00158800 |
| C                                            | -1.33424700 | -0.08081000 | 1.19905000  |
| C                                            | -1.33477400 | -0.02195200 | -1.20269300 |
| C                                            | -2.72204900 | -0.10980600 | 1.20712000  |
| H                                            | -0.78756900 | -0.08535300 | 2.13837500  |



|   |             |             |             |
|---|-------------|-------------|-------------|
| C | -2.72249900 | -0.04773900 | -1.21136200 |
| H | -0.78845700 | 0.01809300  | -2.14140400 |
| C | -3.45467000 | -0.10377900 | -0.00256800 |
| H | -3.23659400 | -0.13327000 | 2.15979400  |
| H | -3.23799800 | -0.02517900 | -2.16366000 |
| N | -4.82985500 | -0.15638200 | -0.00506400 |
| C | -5.54320800 | -0.01013800 | 1.25031800  |
| H | -5.34398700 | 0.95568100  | 1.73701900  |
| H | -6.61358700 | -0.08752500 | 1.05827700  |
| H | -5.26984900 | -0.80814700 | 1.94827500  |
| C | -5.54168900 | 0.11702300  | -1.24046200 |
| H | -5.30442600 | -0.63109200 | -2.00407300 |
| H | -6.61360100 | 0.07029600  | -1.04758000 |
| H | -5.30335100 | 1.11015300  | -1.64748200 |

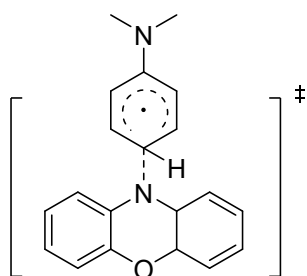

|                                              |             |             |             |
|----------------------------------------------|-------------|-------------|-------------|
| Thermal correction to Gibbs Free Energy=     |             |             | 0.299633    |
| Sum of electronic and thermal Free Energies= |             |             | -957.531756 |
| C                                            | 1.64160100  | 1.94492100  | 1.79281300  |
| C                                            | 0.73193300  | 0.90496500  | 1.97184100  |
| C                                            | -0.30151400 | 0.68365200  | 1.05430500  |
| C                                            | -0.42447300 | 1.57934400  | -0.02116000 |
| C                                            | 0.46972100  | 2.62560200  | -0.20764600 |
| C                                            | 1.51904400  | 2.79647400  | 0.69497100  |
| C                                            | -2.49947800 | 0.64515000  | -0.55683100 |
| C                                            | -2.36437400 | -0.26928200 | 0.49873500  |
| C                                            | -3.46633700 | -1.07008700 | 0.81611200  |
| H                                            | -3.36389700 | -1.77778900 | 1.63441300  |
| C                                            | -4.65822000 | -0.96635800 | 0.10286400  |
| C                                            | -4.76895500 | -0.04634400 | -0.93948100 |
| C                                            | -3.68686300 | 0.76954000  | -1.26655200 |
| H                                            | 2.44378500  | 2.08960800  | 2.50966000  |
| H                                            | 0.81257100  | 0.23130200  | 2.81917000  |
| H                                            | 0.33484100  | 3.28813900  | -1.05701000 |
| H                                            | 2.22595800  | 3.60676200  | 0.54750400  |
| H                                            | -5.49948400 | -1.60095400 | 0.36278100  |
| H                                            | -5.69557500 | 0.04292900  | -1.49730200 |
| H                                            | -3.74444100 | 1.49603500  | -2.07118100 |

|   |             |             |             |
|---|-------------|-------------|-------------|
| N | -1.14301900 | -0.43557100 | 1.18493900  |
| O | -1.45041400 | 1.45265900  | -0.92439000 |
| C | -0.06113300 | -1.51526100 | -0.97703900 |
| C | 0.87643600  | -2.16123000 | 1.17622100  |
| C | 1.16469900  | -1.05572700 | -1.37662500 |
| H | -0.88898100 | -1.51064100 | -1.68055700 |
| C | 2.10962700  | -1.73457700 | 0.76859800  |
| H | 0.76938200  | -2.65243100 | 2.13898000  |
| C | 2.28770000  | -1.08920900 | -0.49464800 |
| H | 1.28890000  | -0.69431200 | -2.39154100 |
| H | 2.96654800  | -1.89960600 | 1.41266800  |
| N | 3.48680000  | -0.55160200 | -0.85220700 |
| C | 3.63023500  | 0.11956000  | -2.13250600 |
| H | 2.91374100  | 0.94485500  | -2.22526700 |
| H | 4.63832000  | 0.52447700  | -2.20959600 |
| H | 3.47094200  | -0.57231100 | -2.96761000 |
| C | 4.60871800  | -0.58877700 | 0.07016600  |
| H | 4.92135600  | -1.61818200 | 0.28023500  |
| H | 5.45008200  | -0.05708300 | -0.37277700 |
| H | 4.35204900  | -0.10436300 | 1.01991000  |
| C | -0.31468900 | -1.88858100 | 0.39934600  |
| H | -1.16131700 | -2.55014600 | 0.57260900  |

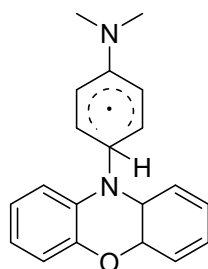

|                                              |             |             |             |
|----------------------------------------------|-------------|-------------|-------------|
| Thermal correction to Gibbs Free Energy=     |             |             | 0.300656    |
| Sum of electronic and thermal Free Energies= |             |             | -957.537626 |
| C                                            | 0.38857700  | 3.08615600  | 0.59953800  |
| C                                            | 0.39560600  | 1.71216200  | 0.34522400  |
| C                                            | -0.77941500 | 1.05673100  | -0.03478700 |
| C                                            | -1.95693300 | 1.81960900  | -0.11584100 |
| C                                            | -1.97298200 | 3.17515200  | 0.15908400  |
| C                                            | -0.78576100 | 3.82290400  | 0.50730300  |
| C                                            | -3.26239600 | -0.10959100 | -0.19308400 |
| C                                            | -2.11571900 | -0.91818000 | -0.11242100 |
| C                                            | -2.29252000 | -2.27029200 | 0.19474600  |
| H                                            | -1.43492900 | -2.92461900 | 0.30375200  |
| C                                            | -3.57573900 | -2.79575300 | 0.37092800  |
| C                                            | -4.69623000 | -1.98070700 | 0.27496700  |

|   |             |             |             |
|---|-------------|-------------|-------------|
| C | -4.53239100 | -0.61981700 | 0.00404500  |
| H | 1.31825600  | 3.57243800  | 0.87818800  |
| H | 1.32008900  | 1.15729800  | 0.44098200  |
| H | -2.91422400 | 3.70976000  | 0.07901500  |
| H | -0.78956900 | 4.88917800  | 0.70742300  |
| H | -3.68452100 | -3.85215800 | 0.59488000  |
| H | -5.69197200 | -2.38800000 | 0.41435100  |
| H | -5.38031600 | 0.05330100  | -0.07394600 |
| N | -0.87183900 | -0.31031700 | -0.34746900 |
| O | -3.13561600 | 1.22436300  | -0.51645200 |
| C | 1.25829300  | -0.55488100 | -1.56887400 |
| C | 1.04715500  | -1.46969000 | 0.73402700  |
| C | 2.58872600  | -0.38174000 | -1.35601100 |
| H | 0.81736900  | -0.27295600 | -2.52094900 |
| C | 2.37765500  | -1.26191800 | 0.91599200  |
| H | 0.44662300  | -1.87030800 | 1.54686200  |
| C | 3.21768900  | -0.72447200 | -0.11456700 |
| H | 3.18437100  | 0.04717300  | -2.15488600 |
| H | 2.80975600  | -1.50663500 | 1.88073600  |
| N | 4.56772400  | -0.55949700 | 0.07625100  |
| C | 5.35628500  | 0.12976200  | -0.92950200 |
| H | 5.03448100  | 1.17178400  | -1.06414600 |
| H | 6.40204800  | 0.12483600  | -0.62265300 |
| H | 5.28501800  | -0.38047800 | -1.89507700 |
| C | 5.12838200  | -0.71220900 | 1.40747800  |
| H | 4.96300200  | -1.72529200 | 1.78788800  |
| H | 6.20379200  | -0.54191500 | 1.35957400  |
| H | 4.69301900  | 0.00059700  | 2.12122100  |
| C | 0.33187400  | -1.15270100 | -0.54995000 |
| H | -0.08949300 | -2.07335300 | -0.98284400 |
